# Supplementary material
Source: PubMed Central journal article supplement (PMC7611267)
Supplement: EMS124566-supplement-Peer_Review_File.pdf [file EMS124566-supplement-Peer_Review_File.pdf]

## Peer Review Information

---

**Journal:** Nature Cell Biology

**Manuscript Title:** Cell fate coordinates mechano-osmotic forces in intestinal crypt formation.

**Corresponding author name(s):** Prisca Liberali

### Reviewer Comments & Decisions:

#### Decision Letter, initial version:

**Date:** 29th September 20 11:49:13

**Last Sent:** 29th September 20 11:49:13

**Triggered By:** Christine Weber

**From:** christine.weber@nature.com

**To:** prisca.liberali@fmi.ch

**CC:** ncb@springernature.com

**Subject:** Decision on Nature Cell Biology submission NCB-L43714-T

**Message:** \*Please delete the link to your author homepage if you wish to forward this email to co-authors.

Dear Prisca,

As Dr Andrew Cox has now left the journal, I will be taking over the handling of your paper from him. I am writing to let you know that your manuscript, "Cell fate coordinates mechano-osmotic forces in intestinal crypt formation", has now been seen by 3 referees, who are experts in intestinal organoids, mechanobiology (referee 1); intestinal organoids (referee 2); and biomechanics, morphogenesis, modelling (referee 3). As you will see from their comments (attached below) they find this work of potential interest, but have raised substantial concerns, which in our view would need to be addressed with considerable revisions before we can consider publication in Nature Cell Biology.

Nature Cell Biology editors discuss the referee reports in detail within the editorial team, including the chief editor, to identify key referee points that should be addressed with priority, and requests that are overruled as being beyond the scope of the current study. To guide the scope of the revisions, I have listed these points below. We are committed to providing a fair and constructive peer-review process,

so please feel free to contact me if you would like to discuss any of the referee comments further.

In particular, it would be essential to address the following editorial priorities:

(A) Additional mechanistic insights should be provided, as highlighted by referees 1 and 2.

Referee 2 notes:

"As a mechanism, the authors explore differential localization of ZO1, Occludin, Claudin2 and N-cadherin. They observe interesting crypt-specific patterns of Occludin, Claudin2 and N-cadherin while ZO1 was expressed in the crypt and villus apical surface and in the villus basal surface. They conclude "However, among them, only ZO-1 overlaps with the basal pool of Myh-9-GFP in organoid villus region, and exhibits villus basolateral localization both in vitro and in vivo during crypt morphogenesis". Yet, the authors do not provide in vivo data for Occludin, Claudin2 or N-cadherin. Moreover, they did not look at any of the markers with high temporal resolution around the time of crypt emergence in vivo (i.e. around Post-natal day 14). It is possible that both basal ZO1 in the villus region coupled with apical Occludin/Claudin2/N-cadherin in the crypt domain are both important for the process of actomyosin patterning and crypt budding. It seems that the conclusion that ZO1 contributes to the emergence of the region-specific actomyosin pattern overlooks this possibility. Some additional immunostaining in vivo during the time of crypt formation will be helpful to add this valuable information."

Referee 1 notes:

"5. Fig. 2E and F: To be able to draw conclusions from the difference of tension in the crypt and villus region, the authors should verify the correlation between Myh9 expression and the intensity, as it seems like the intensity is higher where there is a curvature which could be due to the compactness of the cells in those regions."

"7. In Fig. S5C, the enrichment of villus basal Myh9 is not clear. Removing the signal from the dead cells may enhance the contrast."

"16. How do the ion channel piezo1 or piezo2 as mechanosensors affect the emergence of bulge or bud in the organoids? Experiments should be conducted using an activator (Yoda-1) or inhibitor (GdCl3) of these piezo channels."

(B) Additional experiments should be performed to confirm that lumen volume reduction accelerates crypt morphogenesis and it should be tested whether additional factors could have an effect, as pointed out by all three referees.

Referee 1 notes:

"11. In Fig. S8E, the authors aimed to show the effect of deflation using an osmotic shock on crypt emergence; however, the red arrows are not convincingly showing any emergence of crypts.

12. In Fig. 4, the authors should explain how they have derived enterocysts. Moreover, it is not clear how the collapse of the inflated epithelium is related to the increase of enterocyte size. For example, luminal fluid could escape through the rupture of the epithelial monolayer or just go into a different part of the organoid, or even through paracellular leakage."

Referee 2 notes:

"For lumen volume experiments that used osmotic shock – the authors should show that cells are viable and that the cells themselves are not affected by the osmotic shock. Should the osmotic shock affect the cells themselves (and not just lumen volume), the current interpretation of the experiment would likely need to be revised.

Also – for these experiments, the authors concluded "seconds after the osmotic deflation, the Day3.5 organoids formed bulges in the crypt regions enriched in Lgr-5+ stem cells, while the Day2.5 and Day3.5 CHIR-treated organoids remained spherical and did not display significant bulging"; however, in the eccentricity measurement, the day 3.5 CHIR showed statistically significant increased eccentricity after osmotic shock (Fig 8SE – box plot). Is this conclusion at odds with the statistical analysis?

Figure 4D – are the authors claiming that total enterocyst volume does not change? It seems that lumen volume goes down, cell volume does go up, but total volume goes up initially and then back down. Can the total loss of lumen volume be accounted for by the increase in cell volume? It does not seem like cell volume increases sufficiently to account for 100% of lumen volume loss, but this is something the authors could calculate."

"The authors nicely show using LifeAct and Myh-9-GFP, coupled with direct measurements of the tension in the basal surface of crypts vs. villi that there are differential tensions and localization of Myh-9-GFP on the basal surface. Assuming that the epithelium of both the crypt and villus region are interacting with the homogeneous extracellular matrix (Matrigel) during the process of crypt budding, have the authors examined the interaction of the crypt and villus epithelium with the surrounding matrix, and is there any evidence that this interaction (i.e. remodeling of matrix proteins) is correlated with the crypt region vs. the villus region? That is, is the matrix also an active participant in this process, or a passive bystander that simply gets pushed around by epithelial forces?"

"For Figure 4A – were enterocysts and CHIR grown organoids given osmotic shock? The section heading indicates this is the case, but the text and figure legend do not explicitly state they were treated with osmotic shock."

Referee 3 notes:

- Lumen shrinkage and epithelial volume increase are nicely demonstrated. However, the authors do not discuss the possibility of local differences in cell division contributing to the crypt vs. villus epithelium differentially. Are there local differences in cell division and if yes, how would they affect the model?

- The authors note that the mesenchyme is important for the formation of villi in

vivo and say that the organoids can form a crypt and villus without mesenchyme. Could the authors discuss possible effects of the mesenchyme on crypt morphogenesis in vivo, especially how it would impact the mechanical landscape? This would be helpful and contextualize the work better in existing work on intestinal development (e.g. references 5, 11).

- The authors propose that osmotic transport of fluid into the enterocytes in the villus results in lumen volume reduction. In Supplementary Figure 9, they track crypt and villus cell volume changes. A figure showing the volume reduction in the lumen side by side with the total volume increase in the villus epithelium (or a similar comparison) would strengthen this point and add additional quantification to it.

(C) The association of cell fate and osmotic and actomyosin forces in intestinal crypt formation should be further investigated to avoid overstatements.

Referee 2 notes:

"Is the differentiation of a Paneth cell at all correlated with apical constriction and crypt formation? Would crypts/buds form in the absence of PCs, such as in the ATOH1-null epithelium? Certainly crypts seem to form just fine in genetic ATOH1-null animals; however since this group has attributed the symmetry breaking (and initiation of bulging/budding) of the cyst in part to PCs, it would be interesting to know if PC are in any way correlated to Myh-9-GFP in the context of organoid crypt budding."

Referee 3 notes:

"• The title of the paper comprises the term "cell fate coordinates", however how cell fate leads to differential apical actin constriction in the crypt region is not a major focus of the paper. I suggest to either include more data on how cell fate controls apical constriction and thereby tissue curvature or rephrase the title to better represent the focus of the paper on apical/basal tension, tissue curvature, lumen volume and cell swelling."

(D) All other referee concerns pertaining to increasing sample sizes (at least 3 per experiment), strengthening existing data, providing further methodological clarifications and textual changes should also be addressed. Please ensure that figure legends do not exceed 350 words - all descriptions of findings should go into the Results section.

(E) Finally please pay close attention to our guidelines on statistical and methodological reporting (listed below) as failure to do so may delay the reconsideration of the revised manuscript. In particular please provide:

- a Supplementary Figure including unprocessed images of all gels/blots in the form of a multi-page pdf file. Please ensure that blots/gels are labeled and the sections presented in the figures are clearly indicated.

- a Supplementary Table including all numerical source data in Excel format, with data for different figures provided as different sheets within a single Excel file. The file should include source data giving rise to graphical representations and statistical descriptions in the paper and for all instances where the figures present representative experiments of multiple independent repeats, the source data of all repeats should be provided.

We would be happy to consider a revised manuscript that would satisfactorily address these points, unless a similar paper is published elsewhere, or is accepted for publication in Nature Cell Biology in the meantime.

When revising the manuscript please:

- ensure that it conforms to our format instructions and publication policies (see below and [www.nature.com/nature/authors/](http://www.nature.com/nature/authors/)).

- provide a point-by-point rebuttal to the full referee reports verbatim, as provided at the end of this letter.

- provide the completed Reporting Summary (found here <https://www.nature.com/documents/nr-reporting-summary.pdf>). This is essential for reconsideration of the manuscript will be available to editors and referees in the event of peer review. For more information see <http://www.nature.com/authors/policies/availability.html> or contact me.

When submitting the revised version of your manuscript, please pay close attention to our [href="https://www.nature.com/nature-research/editorial-policies/image-integrity"](https://www.nature.com/nature-research/editorial-policies/image-integrity)>Digital Image Integrity Guidelines. and to the following points below:

-- that unprocessed scans are clearly labelled and match the gels and western blots presented in figures.

-- that control panels for gels and western blots are appropriately described as loading on sample processing controls

-- all images in the paper are checked for duplication of panels and for splicing of gel lanes.

Finally, please ensure that you retain unprocessed data and metadata files after publication, ideally archiving data in perpetuity, as these may be requested during the peer review and production process or after publication if any issues arise.

This journal strongly supports public availability of data. Please place the data used in your paper into a public data repository, or alternatively, present the data as Supplementary Information. If data can only be shared on request, please explain why in your Data Availability Statement, and also in the correspondence with your editor. Please note that for some data types, deposition in a public repository is mandatory - more information on our data deposition policies and available repositories appears below.

Please submit the revised manuscript files and the point-by-point rebuttal to the referee comments using this link:

<https://mts-ncb.nature.com/cgi-bin/main.plex?el=A6C1CuG2A1umA1J4A9ftdNQ3TtDf0VWaw1n6fd7OJwZ>

\*This url links to your confidential home page and associated information about manuscripts you may have submitted or be reviewing for us. If you wish to forward this email to co-authors, please delete the link to your homepage.

We would like to receive a revised submission within six months. We are aware that many researchers are currently facing disruptions because of the COVID-19 pandemic. If you anticipate significant delays for these revisions, please do let us know as we are happy to extend deadlines as necessary.

We hope that you will find our referees' comments, and editorial guidance helpful. Please do not hesitate to contact me if there is anything you would like to discuss.

With best wishes,

Christine.

Christine Weber, PhD  
Senior Editor  
Nature Cell Biology  
E-mail: [christine.weber@nature.com](mailto:christine.weber@nature.com)  
Phone: +44 (0)207 843 4924

-----  
Reviewers' Comments:

Reviewer #1:

Remarks to the Author:

In this manuscript, Yang et al explore the mechanisms of mouse intestinal crypt morphogenesis by developing a 3D vertex model and combining it with light-sheet microscopy. The authors demonstrate that in addition to actomyosin contraction, lumen volume reduction via cell swelling in the villus region is crucial for crypt formation. This work highlights the role of mechano-osmotic forces during crypt morphogenesis and is of interest to the organoid and mechanobiology community. There are several concerns that need to be addressed to render the manuscript acceptable for publication:

1. In Figure 1B, and C (and Fig. S9B), it is not clear how the segmentation was done for the crypt section of the bulged organoids.
2. Statistical analysis for Figure 1C needs to be repeated considering  $n$  = number of the organoids, not single cells or preferably organoids from different time points. P values of  $10^{-36}$  or  $-28$  have been derived based on an incorrect " $n$ ".

3. In Fig. S1A, the reduction of distance between adjacent nuclei (as mentioned in line 85 of the text) cannot be seen by immunostaining. It seems that the distance has been increased. Counting the number of nuclei in the crypt area may be a better readout here. Also, y-axis labels of Figure S1A' and B' are missing. These findings are also in contradiction to the schematic of Fig. 1A. Fig. S1 C, D are not clearly showing the conservation of the observed phenomenon in vivo.

4. Model derivation:

\* line 312: does it mean that 2

\* line 324: equation 6 is somewhat misleading as after derivation the substituted boundary conditions (R at equilibrium) and the variable radius have been labeled similarly (also in line 325 while defining the deformation ratio). The same is true for equation 7.

5. Fig. 2E and F: To be able to draw conclusions from the difference of tension in the crypt and villus region, the authors should verify the correlation between Myh9 expression and the intensity, as it seems like the intensity is higher where there is a curvature which could be due to the compactness of the cells in those regions.

6. Please discuss the paper by Zhao et al. Nat. Comm. 2015 on the effect of Blebbistatin in crypt formation regarding Fig. S5. In this paper Blebbistatin was shown to enhance crypt formation in mouse intestinal organoids.

7. In Fig. S5C, the enrichment of villus basal Myh9 is not clear. Removing the signal from the dead cells may enhance the contrast.

8. In Fig. S5D, n=2 is insufficient (line 1125).

9. In the caption of Fig. S5 (line 1129), it should be re-growth instead of re-grow.

10. Fig. S8D,E: How does the signal of Lgr5 change after inflation and collapse/deflation of the organoids?

11. In Fig. S8E, the authors aimed to show the effect of deflation using an osmotic shock on crypt emergence; however, the red arrows are not convincingly showing any emergence of crypts.

12. In Fig. 4, the authors should explain how they have derived enterocysts. Moreover, it is not clear how the collapse of the inflated epithelium is related to the increase of enterocyte size. For example, luminal fluid could escape through the rupture of the epithelial monolayer or just go into a different part of the organoid, or even through paracellular leakage.

13. Line 305 of the main text refers to Fig. S9D and not Fig. S9C.

14. Line 314 of the main text refers to Fig. 4H.

15. Moreover, line 316 and 318 refer to Fig. 4I-I' and S9E instead of Fig. 4H and Fig. S9D.

16. How do the ion channel piezo1 or piezo2 as mechanosensors affect the

emergence of bulge or bud in the organoids? Experiments should be conducted using an activator (Yoda-1) or inhibitor (GdCl<sub>3</sub>) of these piezo channels.

Reviewer #2:

Remarks to the Author:

Yang and Xue and colleagues follow up on previous work from the Liberali lab that showed how intestinal organoids/enteroids break symmetry after initially forming as a uniform cystic structure. In the current work, the authors focus on the cellular mechanisms that drive the process of bulging and budding during crypt formation in organoids following this symmetry breaking event. They demonstrate that apical contraction in crypts and basal tension in the villus generate curvatures leading to crypt formation, and that enterocytes contribute to this process by swelling.

Overall this is a strong manuscript. It validates qualitative observations with rigorous quantitative analysis, and also provides mathematical modeling and theory to describe the observations being made. Thus, claims made are mostly supported with compelling data.

I had only a handful of comments/critiques/questions:

Major points:

Is the differentiation of a Paneth cell at all correlated with apical constriction and crypt formation? Would crypts/buds form in the absence of PCs, such as in the ATOH1-null epithelium? Certainly crypts seem to form just fine in genetic ATOH1-null animals; however since this group has attributed the symmetry breaking (and initiation of bulging/budding) of the cyst in part to PCs, it would be interesting to know if PC are in any way correlated to Myh-9-GFP in the context of organoid crypt budding.

As a mechanism, the authors explore differential localization of ZO1, Occludin, Claudin2 and N-cadherin. They observe interesting crypt-specific patterns of Occludin, Claudin2 and N-cadherin while ZO1 was expressed in the crypt and villus apical surface and in the villus basal surface. They conclude "However, among them, only ZO-1 overlaps with the basal pool of Myh-9-GFP in organoid villus region, and exhibits villus basolateral localization both in vitro and in vivo during crypt morphogenesis". Yet, the authors do not provide in vivo data for Occludin, Claudin2 or N-cadherin. Moreover, they did not look at any of the markers with high temporal resolution around the time of crypt emergence in vivo (i.e. around Post-natal day 14). It is possible that both basal ZO1 in the villus region coupled with apical Occludin/Claudin2/N-cadherin in the crypt domain are both important for the process of actomyosin patterning and crypt budding. It seems that the conclusion that ZO1 contributes to the emergence of the region-specific actomyosin pattern overlooks this possibility. Some additional immunostaining in vivo during the time of crypt formation will be helpful to add this valuable information.

For lumen volume experiments that used osmotic shock – the authors should show that cells are viable and that the cells themselves are not affected by the osmotic shock. Should the osmotic shock affect the cells themselves (and not just lumen



volume), the current interpretation of the experiment would likely need to be revised.

Also – for these experiments, the authors concluded “seconds after the osmotic deflation, the Day3.5 organoids formed bulges in the crypt regions enriched in Lgr-5+ stem cells, while the Day2.5 and Day3.5 CHIR-treated organoids remained spherical and did not display significant bulging”; however, in the eccentricity measurement, the day 3.5 CHIR showed statistically significant increased eccentricity after osmotic shock (Fig 8SE – box plot). Is this conclusion at odds with the statistical analysis?

Figure 4D – are the authors claiming that total enterocyst volume does not change? It seems that lumen volume goes down, cell volume does go up, but total volume goes up initially and then back down. Can the total loss of lumen volume be accounted for by the increase in cell volume? It does not seem like cell volume increases sufficiently to account for 100% of lumen volume loss, but this is something the authors could calculate.

Minor points:

Perhaps semantics or differences of word usage in different fields (i.e. biological vs. mathematical/theoretical), but the authors refer to the change in curvatures that lead to crypt formation as “spontaneous”; however, their previous work (Serra and Mayr et al.) demonstrated that the process of symmetry breaking is very stereotyped and reproducible. That is, the formation/differentiation of a Paneth cell precedes budding. Thus, the word “spontaneous” seems rather at odds with an active and stereotyped process in the biological sense.

The authors nicely show using LifeAct and Myh-9-GFP, coupled with direct measurements of the tension in the basal surface of crypts vs. villi that there are differential tensions and localization of Myh-9-GFP on the basal surface. Assuming that the epithelium of both the crypt and villus region are interacting with the homogeneous extracellular matrix (Matrigel) during the process of crypt budding, have the authors examined the interaction of the crypt and villus epithelium with the surrounding matrix, and is there any evidence that this interaction (i.e. remodeling of matrix proteins) is correlated with the crypt region vs. the villus region? That is, is the matrix also an active participant in this process, or a passive bystander that simply gets pushed around by epithelial forces?

In Figure 2B, it will be helpful if the authors label each of the 3 scenarios in the schematic corresponding to their numerical assignments in the text (i.e. scenario “i)”, “ii)”, and “iii)”).

In the text the authors state: “This provides a key qualitative test of the mechanism we propose: a mechanism of softer crypts would result in the reverse trend of preferential crypt expansion, a mechanism of budding via crypt cell proliferation (i.e. buckling) would result in crypt opening as fluid injection increases the area/volume ratio (22) (see SI Text for detailed discussion).” Here, the authors state two alternative possibilities to the mechanism they propose. It will be helpful for the readers if they re-state their proposed mechanism first, and explicitly call the discussion points above “alternative mechanisms”, which do not fit their model.

For Figure 4A – were enterocysts and CHIR grown organoids given osmotic shock? The section heading indicates this is the case, but the text and figure legend do not explicitly state they were treated with osmotic shock.

Figure 4 panels are mis-labeled in the text (i.e. figure 4G).

Reviewer #3:

Remarks to the Author:

Summary:

In this study, the authors use a 3D organoid culture model to identify a mechanical mechanism for crypt morphogenesis. The authors examine the effects of actomyosin-driven apical contraction, villus basal tension, lumen volume and tissue volume on the geometry of organoids with developing intestinal crypts both experimentally and in a biophysical model. The authors nicely use their model to guide experimental perturbations that are then used to confirm model predictions and find that differential spontaneous curvature in the crypt vs. villus region together with lumen volume reduction can explain the morphological changes during crypt budding. The differential curvature nicely matches the pattern of myosin localization at the apical side of the bulging crypt and at the basal side of the villus region leading to increased tension as demonstrated by laser nanosurgery and micropipette aspiration assays. Upon inflation of the lumen using pharmaceutical and mechanical methods, budded crypts could not be opened, but less developed bulged crypts could be as predicted by the model. Furthermore, lumen volume was found to be osmotically redistributed from the lumen to the enterocytes in the villus region, increasing compressive stress on the crypt and thereby supporting budding. The authors demonstrated that although the geometry in vivo has an open lumen, swelling of cells in the villus could still contribute to crypt morphogenesis in vivo. In conclusion, the authors elegantly overcome the difficulty of studying an internal organ with limited accessibility by taking advantage of live imaging of intestinal organoids in combination with biophysical modeling to study the mechanical mechanism of crypt formation.

Major Points:

- The title of the paper comprises the term “cell fate coordinates”, however how cell fate leads to differential apical actin constriction in the crypt region is not a major focus of the paper. I suggest to either include more data on how cell fate controls apical constriction and thereby tissue curvature or rephrase the title to better represent the focus of the paper on apical/basal tension, tissue curvature, lumen volume and cell swelling.
- Lumen shrinkage and epithelial volume increase are nicely demonstrated. However, the authors do not discuss the possibility of local differences in cell division contributing to the crypt vs. villus epithelium differentially. Are there local differences in cell division and if yes, how would they affect the model?
- The authors note that the mesenchyme is important for the formation of villi in vivo and say that the organoids can form a crypt and villus without mesenchyme. Could the authors discuss possible effects of the mesenchyme on crypt morphogenesis in vivo, especially how it would impact the mechanical landscape? This would be helpful and contextualize the work better in existing work on intestinal development (e.g. references 5, 11).

## Minor Points:

- The term “spontaneous curvature” is central to the manuscript and should be explained to readers who are not familiar with this terminology. The term “spontaneous curvature” should be clearly separated from the term “spontaneous symmetry breaking” to prevent misunderstandings. If I understand correctly, cell fate leads to local differences in tissue curvature and crypts do not form because of a spontaneous local increase in curvature at a random position of the spheroid.
- One of the major points in the paper is that the spontaneous curvature of the tissue drives morphogenesis. However, the curvature of the villus epithelium in the organoids is inverted compared to the in vivo situation. Could the authors comment/discuss this point?
- The authors propose that osmotic transport of fluid into the enterocytes in the villus results in lumen volume reduction. In Supplementary Figure 9, they track crypt and villus cell volume changes. A figure showing the volume reduction in the lumen side by side with the total volume increase in the villus epithelium (or a similar comparison) would strengthen this point and add additional quantification to it.
- Ref. 11 talks about a “hinge” between the villus and crypt. When the authors discuss in vivo applications of their findings, incorporating a short comment on effects the hinge region would have on morphogenesis would be helpful.
- Figure 2D: The figure panels are very small. Please increase the size by using empty white space in the figure to allow the reader to see the nanosurgery experiments.
- Figure 2D'': The error bars overlap and are not easy to read. Incorporating a design similar to Fig. 1E would improve readability.
- Figure 2E: Include a panel showing a zoom-in onto the micropipette so that the reader can see the difference in basal tension in the crypt vs vilus region.
- Figure 2F, F', F'', F''': The authors show an image of basal Myh-9-GFP intensity in the villus and crypt, but do not quantify or directly compare the two, instead incorporating them into an overall intensity in F''. A figure similar to F' but for the basal side would be helpful to compare myosin between the two regions on the basal side (presumably important for maintaining villus tension).
- Figure 2 legend: The legend is very long. Consider shortening for example by moving information about method details (for the micropipette aspiration assay) to the method section rather than the figure legend.
- Methods section: please make sure to explain abbreviations used such as FCN
- Typos in the text:
  - o Line 61: “Day3” and “Day4” are missing blanks
  - o Line 137: There is no Fig. 2C'''. Please refer to the correct figure panel.
  - o Line 151: Fig. 2D-D'' should read Fig. 2D-D'''.
  - o Line 314: “Fig. 4G” should be replaced with “Fig. 4H”.
  - o Line 318: “Fig. 4H” should be replaced with “Fig. 4I”.

## GUIDELINES FOR MANUSCRIPT SUBMISSION TO NATURE CELL BIOLOGY

**READABILITY OF MANUSCRIPTS** – Nature Cell Biology is read by cell biologists from diverse backgrounds, many of whom are not native English speakers. Authors should aim to communicate their findings clearly, explaining technical jargon that might be unfamiliar to non-specialists, and avoiding non-standard abbreviations. Titles and abstracts should concisely communicate the main findings of the study, and the background, rationale, results and conclusions should be clearly explained in the manuscript in a manner accessible to a broad cell biology audience. Nature Cell Biology uses British spelling.

**MANUSCRIPT FORMAT** – please follow the guidelines listed in our Guide to Authors regarding manuscript formats at Nature Cell Biology.

**TITLE** – should be no more than 100 characters including spaces, without punctuation and avoiding technical terms, abbreviations, and active verbs..

**AUTHOR NAMES** – should be given in full.

**AUTHOR AFFILIATIONS** – should be denoted with numerical superscripts (not symbols) preceding the names. Full addresses should be included, with US states in full and providing zip/post codes. The corresponding author is denoted by: "Correspondence should be addressed to [initials]."

**ABSTRACT AND MAIN TEXT** – please follow the guidelines that are specific to the format of your manuscript, as listed in our Guide to Authors ([http://www.nature.com/ncb/pdf/ncb\\_gta.pdf](http://www.nature.com/ncb/pdf/ncb_gta.pdf)) Briefly, Nature Cell Biology Articles, Resources and Technical Reports have 3500 words, including a 150 word abstract, and the main text is subdivided in Introduction, Results, and Discussion sections. Nature Cell Biology Letters have up to 2500 words, including a 180 word introductory paragraph (abstract), and the text is not subdivided in sections.

**ACKNOWLEDGEMENTS** – should be kept brief. Professional titles and affiliations are unnecessary. Grant numbers can be listed.

**AUTHOR CONTRIBUTIONS** – must be included after the Acknowledgements, detailing the contributions of each author to the paper (e.g. experimental work, project planning, data analysis etc.). Each author should be listed by his/her initials.

**FINANCIAL AND NON-FINANCIAL COMPETING INTERESTS** – the authors must include one of three declarations: (1) that they have no financial and non-financial competing interests; (2) that they have financial and non-financial competing interests; or (3) that they decline to respond, after the Author Contributions section. This statement will be published with the article, and in cases where financial and non-financial competing interests are declared, these will be itemized in a web supplement to the article. For further details please see <https://www.nature.com/licenceforms/nrg/competing-interests.pdf>.

REFERENCES – are limited to a total of 70 for Articles, Resources, Technical Reports; and 40 for Letters. This includes references in the main text and Methods combined. References must be numbered sequentially as they appear in the main text, tables and figure legends and Methods and must follow the precise style of Nature Cell Biology references. References only cited in the Methods should be numbered consecutively following the last reference cited in the main text. References only associated with Supplementary Information (e.g. in supplementary legends) do not count toward the total reference limit and do not need to be cited in numerical continuity with references in the main text. Only published papers can be cited, and each publication cited should be included in the numbered reference list, which should include the manuscript titles. Footnotes are not permitted.

METHODS – Nature Cell Biology publishes methods online. The methods section should be provided as a separate Word document, which will be copyedited and appended to the manuscript PDF, and incorporated within the HTML format of the paper.

Methods should be written concisely, but should contain all elements necessary to allow interpretation and replication of the results. As a guideline, Methods sections typically do not exceed 3,000 words. The Methods should be divided into subsections listing reagents and techniques. When citing previous methods, accurate references should be provided and any alterations should be noted. Information must be provided about: antibody dilutions, company names, catalogue numbers and clone numbers for monoclonal antibodies; sequences of RNAi and cDNA probes/primers or company names and catalogue numbers if reagents are commercial; cell line names, sources and information on cell line identity and authentication. Animal studies and experiments involving human subjects must be reported in detail, identifying the committees approving the protocols. For studies involving human subjects/samples, a statement must be included confirming that informed consent was obtained. Statistical analyses and information on the reproducibility of experimental results should be provided in a section titled "Statistics and Reproducibility".

All Nature Cell Biology manuscripts submitted on or after March 21 2016 must include a Data availability statement as a separate section after Methods but before references, under the heading "Data Availability". For Springer Nature policies on data availability see <http://www.nature.com/authors/policies/availability.html>; for more information on this particular policy see <http://www.nature.com/authors/policies/data/data-availability-statements-data-citations.pdf>. The Data availability statement should include:

- Accession codes for primary datasets (generated during the study under consideration and designated as "primary accessions") and secondary datasets (published datasets reanalysed during the study under consideration, designated as "referenced accessions"). For primary accessions data should be made public to coincide with publication of the manuscript. A list of data types for which submission to community-endorsed public repositories is mandated (including sequence, structure, microarray, deep sequencing data) can be found here <http://www.nature.com/authors/policies/availability.html#data>.
- Unique identifiers (accession codes, DOIs or other unique persistent identifier)

and hyperlinks for datasets deposited in an approved repository, but for which data deposition is not mandated (see here for details <http://www.nature.com/sdata/data-policies/repositories>).

- At a minimum, please include a statement confirming that all relevant data are available from the authors, and/or are included with the manuscript (e.g. as source data or supplementary information), listing which data are included (e.g. by figure panels and data types) and mentioning any restrictions on availability.
- If a dataset has a Digital Object Identifier (DOI) as its unique identifier, we strongly encourage including this in the Reference list and citing the dataset in the Methods.

We recommend that you upload the step-by-step protocols used in this manuscript to the Protocol Exchange. More details can be found at [www.nature.com/protocolexchange/about](http://www.nature.com/protocolexchange/about).

**DISPLAY ITEMS** – main display items are limited to 6-8 main figures and/or main tables for Articles, Resources, Technical Reports; and 5 main figures and/or main tables for Letters. For Supplementary Information see below.

**FIGURES** – Colour figure publication costs \$600 for the first, and \$300 for each subsequent colour figure. All panels of a multi-panel figure must be logically connected and arranged as they would appear in the final version. Unnecessary figures and figure panels should be avoided (e.g. data presented in small tables could be stated briefly in the text instead).

All imaging data should be accompanied by scale bars, which should be defined in the legend.

Cropped images of gels/blots are acceptable, but need to be accompanied by size markers, and to retain visible background signal within the linear range (i.e. should not be saturated). The boundaries of panels with low background have to be demarked with black lines. Splicing of panels should only be considered if unavoidable, and must be clearly marked on the figure, and noted in the legend with a statement on whether the samples were obtained and processed simultaneously. Quantitative comparisons between samples on different gels/blots are discouraged; if this is unavoidable, it should only be performed for samples derived from the same experiment with gels/blots were processed in parallel, which needs to be stated in the legend.

Figures should be provided at approximately the size that they are to be printed at (single column is 86 mm, double column is 170 mm) and should not exceed an A4 page (8.5 x 11"). Reduction to the scale that will be used on the page is not necessary, but multi-panel figures should be sized so that the whole figure can be reduced by the same amount at the smallest size at which essential details in each panel are visible. In the interest of our colour-blind readers we ask that you avoid using red and green for contrast in figures. Replacing red with magenta and green with turquoise are two possible colour-safe alternatives. Lines with widths of less than 1 point should be avoided. Sans serif typefaces, such as Helvetica (preferred) or Arial should be used. All text that forms part of a figure should be rewritable and

removable.

We accept files from the following graphics packages in either PC or Macintosh format:

- For line art, graphs, charts and schematics we prefer Adobe Illustrator (.AI), Encapsulated PostScript (.EPS) or Portable Document Format (.PDF). Files should be saved or exported as such directly from the application in which they were made, to allow us to restyle them according to our journal house style.

- We accept PowerPoint (.PPT) files if they are fully editable. However, please refrain from adding PowerPoint graphical effects to objects, as this results in them outputting poor quality raster art. Text used for PowerPoint figures should be Helvetica (preferred) or Arial.

- We do not recommend using Adobe Photoshop for designing figures, but we can accept Photoshop generated (.PSD or .TIFF) files only if each element included in the figure (text, labels, pictures, graphs, arrows and scale bars) are on separate layers. All text should be editable in 'type layers' and line-art such as graphs and other simple schematics should be preserved and embedded within 'vector smart objects' - not flattened raster/bitmap graphics.

- Some programs can generate Postscript by 'printing to file' (found in the Print dialogue). If using an application not listed above, save the file in PostScript format or email our Art Editor, Allen Beattie for advice (a.beattie@nature.com).

Regardless of format, all figures must be vector graphic compatible files, not supplied in a flattened raster/bitmap graphics format, but should be fully editable, allowing us to highlight/copy/paste all text and move individual parts of the figures (i.e. arrows, lines, x and y axes, graphs, tick marks, scale bars etc.). The only parts of the figure that should be in pixel raster/bitmap format are photographic images or 3D rendered graphics/complex technical illustrations.

All placed images (i.e. a photo incorporated into a figure) should be on a separate layer and independent from any superimposed scale bars or text. Individual photographic images must be a minimum of 300+ DPI (at actual size) or kept constant from the original picture acquisition and not decreased in resolution post image acquisition. All colour artwork should be RGB format.

**FIGURE LEGENDS** – must not exceed 350 words for each figure to allow fit on a single printed NCB page together with the figure. They must include a brief title for the whole figure, and short descriptions of each panel with definitions of the symbols used, but without detailing methodology.

**TABLES** – main tables should be provided as individual Word files, together with a brief title and legend. For supplementary tables see below.

**SUPPLEMENTARY INFORMATION** – Supplementary information is material directly relevant to the conclusion of a paper, but which cannot be included in the printed

version in order to keep the manuscript concise and accessible to the general reader. Supplementary information is an integral part of a Nature Cell Biology publication and should be prepared and presented with as much care as the main display item, but it must not include non-essential data or text, which may be removed at the editor's discretion. All supplementary material is fully peer-reviewed and published online as part of the HTML version of the manuscript. Supplementary Figures and Supplementary Notes are appended at the end of the main PDF of the published manuscript.

Supplementary items should relate to a main text figure, wherever possible, and should be mentioned sequentially in the main manuscript, designated as Supplementary Figure, Table, Video, or Note, and numbered continuously (e.g. Supplementary Figure 1, Supplementary Figure 2, Supplementary Table 1, Supplementary Table 2 etc.).

Unprocessed scans of all key data generated through electrophoretic separation techniques need to be presented in a supplementary figure that should be labelled and numbered as the final supplementary figure, and should be mentioned in every relevant figure legend. This figure does not count towards the total number of figures and is the only figure that can be displayed over multiple pages, but should be provided as a single file, in PDF or TIFF format. Data in this figure can be displayed in a relatively informal style, but size markers and the figures panels corresponding to the presented data must be indicated.

The total number of Supplementary Figures (not including the "unprocessed scans" Supplementary Figure) should not exceed the number of main display items (figures and/or tables (see our Guide to Authors and March 2012 editorial <http://www.nature.com/ncb/authors/submit/index.html#supinfo>; <http://www.nature.com/ncb/journal/v14/n3/index.html#ed>). No restrictions apply to Supplementary Tables or Videos, but we advise authors to be selective in including supplemental data.

Each Supplementary Figure should be provided as a single page and as an individual file in one of our accepted figure formats and should be presented according to our figure guidelines (see above). Supplementary Tables should be provided as individual Excel files. Supplementary Videos should be provided as .avi or .mov files up to 50 MB in size. Supplementary Figures, Tables and Videos must be accompanied by a separate Word document including titles and legends.

#### GUIDELINES FOR EXPERIMENTAL AND STATISTICAL REPORTING

REPORTING REQUIREMENTS – We are trying to improve the quality of methods and statistics reporting in our papers. To that end, we are now asking authors to complete a reporting summary that collects information on experimental design and reagents. The Reporting Summary can be found here <https://www.nature.com/documents/nr-reporting-summary.pdf> If you would like to reference the guidance text as you complete the template, please access these flattened versions at <http://www.nature.com/authors/policies/availability.html>.



STATISTICS – Wherever statistics have been derived the legend needs to provide the n number (i.e. the sample size used to derive statistics) as a precise value (not a range), and define what this value represents. Error bars need to be defined in the legends (e.g. SD, SEM) together with a measure of centre (e.g. mean, median). Box plots need to be defined in terms of minima, maxima, centre, and percentiles. Ranges are more appropriate than standard errors for small data sets. Wherever statistical significance has been derived, precise p values need to be provided and the statistical test used needs to be stated in the legend. Statistics such as error bars must not be derived from  $n < 3$ . For sample sizes of  $n < 5$  please plot the individual data points rather than providing bar graphs. Deriving statistics from technical replicate samples, rather than biological replicates is strongly discouraged. Wherever statistical significance has been derived, precise p values need to be provided and the statistical test stated in the legend.

Information on how many times each experiment was repeated independently with similar results needs to be provided in the legends and/or Methods for all experiments, and in particular wherever representative experiments are shown.

We strongly recommend the presentation of source data for graphical and statistical analyses as a separate Supplementary Table, and request that source data for all independent repeats are provided when representative experiments of multiple independent repeats, or averages of two independent experiments are presented. This supplementary table should be in Excel format, with data for different figures provided as different sheets within a single Excel file. It should be labelled and numbered as one of the supplementary tables, titled "Statistics Source Data", and mentioned in all relevant figure legends.

#### Author Rebuttal to Initial comments

1 Reviewer #1

2 Remarks to the Author:

3 In this manuscript, Yang et al explore the mechanisms of mouse intestinal crypt morphogenesis by  
4 developing a 3D vertex model and combining it with light-sheet microscopy. The authors  
5 demonstrate that in addition to actomyosin contraction, lumen volume reduction via cell swelling in  
6 the villus region is crucial for crypt formation. This work highlights the role of mechano-osmotic  
7 forces during crypt morphogenesis and is of interest to the organoid and mechanobiology  
8 community. There are several concerns that need to be addressed to render the manuscript  
9 acceptable for publication:

10

11 1. In Figure 1B, and C (and Fig. S9B), it is not clear how the segmentation was done for the crypt  
12 section of the bulged organoids.

13 The crypt regions in bulged and budded organoid were selected depending on the crypt morphology.  
14 In the revised manuscript, we further validated our region selection with previously performed  
15 Lysozyme staining for Paneth cells. The end point of crypt was chosen as the cells that were in the  
16 regions of bulged or budded curvature and with Lysozyme positive cells. An example of how we  
17 selected the crypt region in bulged organoid is now demonstrated in Fig. S1A, and the details are  
18 added in the method section.

19

20 2. Statistical analysis for Figure 1C needs to be repeated considering  $n$  = number of the organoids, not  
21 single cells or preferably organoids from different time points. P values of  $10^{-36}$  or  $-28$  have been  
22 derived based on an incorrect " $n$ ".

23 In the revised manuscript, we have increased the number of organoids for each group (before, bulged  
24 and budded) to 9 Day3, 7 Day3.5 and 6 Day4. Since the plot is showing the data from single cells, the  
25 P-values are generated from the same data. We have added new data to Fig. 1C with newly calculated  
26 P-values for: 1) all the single cells and 2) the average values for each organoid in figure legend of Fig.  
27 1.

28

29 3. In Fig. S1A, the reduction of distance between adjacent nuclei (as mentioned in line 85 of the text)  
30 cannot be seen by immunostaining. It seems that the distance has been increased. Counting the  
31 number of nuclei in the crypt area may be a better readout here. Also, y-axis labels of Figure S1A' and  
32 B' are missing. These findings are also in contradiction to the schematic of Fig. 1A. Fig. S1 C, D are not  
33 clearly showing the conservation of the observed phenomenon *in vivo*?

34 We thank the reviewer for the suggestion. To better display the nuclei, we have now changed the  
35 colour of staining. In addition, we performed a new analysis of counting nuclei in the crypt/villus  
36 regions and measured the cell density along the crypt-villus axis. The new data is now displayed in Fig.  
37 S1 B-C'. The result shows crypt tissue compaction is conserved in organoids and *in vivo* tissue.

38

39 Now the new y-axis labels (Cell density (Cell No. / 10  $\mu$ m)) are added.

40

41 4. Model derivation:

42 \* line 312: does it mean that  $2 < R/h < 10$ ? If so, please add a reference for that.

43 \* line 324: equation 6 is somewhat misleading as after derivation the substituted boundary  
44 conditions ( $R$  at equilibrium) and the variable radius have been labeled similarly (also in line 325  
45 while defining the deformation ratio). The same is true for equation 7.

46 On the first point, this was based on our own measurement of organoid aspect ratio, which we had  
47 already performed for the fitting of the morphogenetic evolution of organoids (Fig. 2) and their  
48 behaviour upon lumen inflation (Fig. 3). Indeed, in these measurements, we constrain the model by  
49 independently measuring the geometrical parameters of the system such as crypt fraction or rescaled  
50 initial thickness of the organoid. This was mentioned in section 4.2.1 (as the values of shape factor  $k_0$ ,  
51 which is related to  $h/R$ ), but we realize that this nomenclature was unclear. We now refer directly to

52 the derivation of the model to better clarify the validity of the assumptions (lines 994-998, page 33 in  
53 supplementary). On the second point, this was indeed a typo introduced in the conversion of the  
54 equation, and was making things unclear, we thank the referee for spotting this and have clarified the  
55 annotations in Eq. 6 and 7 (line 362 and 379 page 11 in supplementary).

56  
57 5. Fig. 2E and F: To be able to draw conclusions from the difference of tension in the crypt and villus  
58 region, the authors should verify the correlation between Myh9 expression and the intensity, as it  
59 seems like the intensity is higher where there is a curvature which could be due to the compactness  
60 of the cells in those regions.

61 We thank the reviewer for this point. To normalize any compaction-related increase of Myh-9-GFP  
62 intensity, we have now measured the intensity of the membrane-targeted green fluorescent protein  
63 (mG) (1) and compared its expression with Myh-9-GFP (Fig. S5E). In opposition to the Myosin  
64 expression pattern, the data shows that the intensity of mG at apical side is higher in villus than in  
65 crypt (which is due to the development of microvilli in villus tissue). Less mG but more Myh-9-GFP  
66 intensity at the crypt apical side indicates that the enrichment of Myh-9-GFP there is independent of  
67 tissue compaction during bulging and budding.

68  
69 6. Please discuss the paper by Zhao et al. Nat. Comm. 2015 on the effect of Blebbistatin in crypt  
70 formation regarding Fig. S5. In this paper Blebbistatin was shown to enhance crypt formation in  
71 mouse intestinal organoids.

72 We thank reviewer for this question. The paper published by Zhao *et al.* (2015) is a very nice paper  
73 where they characterize the role of Myosin IIA (Myh-9) during intestinal regeneration and they  
74 perform many experiments in organoids (2). Most of their experiments is, however, counting the  
75 number of organoids after seeding. As we showed in Serra *et al.* (2019), the formation of organoids  
76 from single cells mimics a regenerative response (3). Therefore, what they show is that Myh-9 and  
77 Blebbistatin affect the number of organoids in a re-growth experiments after mechanical splitting  
78 (they call it number of survived crypts that might be a little misleading in this context). This increased  
79 stemness means that the organoids at the moment of crypt bulging and budding have more stem cells  
80 in the niche from the pre-treatment of blebbistatin in the first 36 hours. Then, they perform more  
81 experiments in which they look at number of crypts per organoids. However, as already mentioned  
82 the starting bulged organoid is different as they have been in Blebbistatin for full 36 hours. Moreover,  
83 the shape of their crypt is different than a control organoid and unfortunately they don't quantify it  
84 (wider crypt). This latter phenotype is very similar to ours when we add Blebbistatin on fully formed  
85 crypts (Fig. S5F). Another final aspect to consider is that Blebbistatin's lifetime in medium is between  
86 10 and 12 hours (this is why we refresh medium more often in our experiments and we don't have  
87 information in the Zhao paper if they refresh medium in their 36 to 72 hours experiments). This means  
88 that the two set of experiments are not directly comparable as they look at a regenerative response  
89 mainly on organoid number without considering crypt morphogenesis while we focus on crypt  
90 morphogenesis and our perturbations are very specifically performed during a short window of time  
91 around crypt morphogenesis. To include this study of blebbistatin and Myh-9 in cell survival and  
92 regeneration, we added text in lines 183-184, page 5.

93  
94 7. In Fig. S5C, the enrichment of villus basal Myh9 is not clear. Removing the signal from the  
95 dead cells may enhance the contrast.

96 We thank the reviewer for the suggestion. We tried manual and threshold-based methods of luminal  
97 signal removal, but it did not result in an improvement due to the low signal-to-noise ratio of the Myh-  
98 9-GFP intensity under time-lapse microscopy settings. We then tried different imaging processing

99 strategies such as threshold-based method and deconvolution, and found that Huygens deconvolution  
100 was efficient at improving the signal-to-noise ratio of Myh9-GFP intensity. The newly processed movie  
101 now displays better the emergence of basal pool of Myh9-GFP (Fig. S5D).

102  
103 8. In Fig. S5D, n=2 is insufficient (line 1125).

104 New Fig. S5F increased the sample numbers in each group to Aphidicolin (n=22), Blebbistatin (n=13)  
105 with an additional control of DMSO (n=6).

106  
107 9. In the caption of Fig. S5 (line 1129), it should be re-growth instead of re-grow.

108 Thank you for pointing this out. Due to change in the data, we changed the text accordingly.

109  
110 10. Fig. S8D,E: How does the signal of Lgr5 change after inflation and collapse/deflation of the  
111 organoids?

112 To answer this, we now provide in our revised manuscript the data of the inflation experiments on  
113 organoid labelled by Lgr5-DTR-GFP. After inflation, we found that Lgr5-DTR-GFP expression does not  
114 show strong changes: the Lgr5 high cells before and after osmotic shock are the same, and the  
115 intensity of Lgr5 remains similar after osmotic shock. We have now added the new data to the  
116 manuscript (Fig. S9E).

117  
118 11. In Fig. S8E, the authors aimed to show the effect of deflation using an osmotic shock on crypt  
119 emergence; however, the red arrows are not convincingly showing any emergence of crypts.

120 We thank the reviewer for raising this point. In the original submission, we applied osmotic shock on  
121 roundish organoids, which induces a bulging phenotype, although increasing the imaging resolution  
122 was indeed needed. In order to better show the emergence of crypts, we now updated these  
123 experiments by performing the same osmotic shock in Lgr5-DTR-GFP and H2B-iRFP labelled organoids,  
124 together with detailed 3D imaging. We believe that these new data show the phenotype in a much  
125 clearer manner and we have also updated the quantification accordingly (Fig. S9F).

126  
127 12. In Fig. 4, the authors should explain how they have derived enterocysts. Moreover, it is not clear  
128 how the collapse of the inflated epithelium is related to the increase of enterocyte size. For example,  
129 luminal fluid could escape through the rupture of the epithelial monolayer or just go into a different  
130 part of the organoid, or even through paracellular leakage.

131 We thank the reviewer for this interesting point. Enterocysts, the organoids that consist of only  
132 enterocytes, are developed from the failure of symmetry breaking and Paneth-cell emergence, and  
133 are recognized by the failure of crypt budding as previously reported (3). We now explain it in the  
134 manuscript and add relative information in the method section.

135  
136 To better address how does the tissue volume change coordinate with the lumen volume reduction,  
137 in the revised manuscript we increased sample number and calculated the change of the absolute  
138 tissue and lumen volume in each movie of enterocysts. As the reviewer pointed out, from our  
139 calculation, the tissue volume first increases and matches lumen volume reduction in a highly faithful  
140 manner (4 out of 5 measured enterocysts) (Reviewer Figure). Importantly, we had shown that this  
141 lumen volume reduction does not happens in organoids in presence of the Sglt1 inhibitor, providing  
142 an independent validation of the importance of osmotic effects for this relocation (Fig. 4 l-l'). However,  
143 in one case the tissue volumes stopped increasing and then reducing slightly while their lumen  
144 volumes kept reducing in the later stage of the movie (Reviewer Figure A). In such case not all of the  
145 luminal fluid goes into enterocytes but rather somewhere else.

146  
147 Combining with what reviewer suggested, we would like to discuss other possibilities of where the not  
148 enterocyte-absorbed luminal fluid could go:

149 1) “luminal fluid could escape through the rupture of the epithelial monolayer”. In healthy  
 150 intestinal epithelium, the rupture of the epithelial monolayer or leakage is less likely to  
 151 happen due to the critical barrier function of epithelium (4, 5). One experimental evidence  
 152 of absence of leakage in the intestinal organoid epithelium is that the intensity of  
 153 autofluorescence in the organoid lumen rapidly increases during lumen volume reduction  
 154 (supplementary movies 1, 2 and 8), supporting that the epithelium is intact enough to keep  
 155 the autofluorescence signal inside.

156 Moreover, in previous research studying luminal fluid escape that drives mouse blastocyst  
 157 development, the lumen leakage is promoted by mitotic cell division (6). However, in the  
 158 examples of enterocysts, which are composed of differentiated post-mitotic enterocytes, the  
 159 lumen volumes are still significantly reduced, excluding the possibility of cell-division-driven  
 160 tissue rupture.

161 Finally, in CHIR-treated organoids (that lack enterocytes) the lumen volume increases without  
 162 any leakage, supporting the role of enterocytes in absorbing the fluid.

163  
 164 2) “...or even through paracellular leakage”. Paracellular water transfer does not cause increased  
 165 enterocyte volume, and relies on blood flow *in vivo*, which is missing in the organoid culture.  
 166 Moreover, *in vivo*, instead of paracellular water permeability, the transcellular pathway can  
 167 transfer water against luminal hypertonic condition through the regulation of cellular osmotic  
 168 gradient (7). In our movies, tissue volumes increase with lumen volumes reduction in the first  
 169 period, indicating primarily the absorption activity in enterocytes drives lumen shrinkage. If  
 170 absorbed water reaches the limit of enterocyte volume, the transcellular rather than  
 171 paracellular pathway can further facilitate water transfer, resulting in constant (or even  
 172 slightly reduced) tissue volume and reduced lumen volume in the later stage in the one  
 173 enterocyst movie (Reviewer Figure A) that behaves differently than the others (Reviewer  
 174 Figure B-E). In fact, in this specific sample, the reduction of lumen volume is higher than the  
 175 rest of samples, supporting the possibility of exceeding the capacity of enterocyte absorption.  
 176 Last but not least, perturbations on transcellular pathway through the inhibition of the AQP  
 177 and Na<sup>+</sup>/K<sup>+</sup> ATPase led to mild lumen shrinkage defect (Fig. S10E), indicating that transcellular  
 178 water transfer could guide the relocation of luminal liquid.

179  
 180 Taken together, we agree with the reviewer and in the current version of the manuscript we explained  
 181 better “how the collapse of the inflated epithelium is related to the increase of enterocyte size” and  
 182 discuss the possibility of transcellular water transfer. Therefore, we re-plotted Fig. 4 with 5 enterocyst  
 183 movies and added explanation for the enterocyte movies in method section.

184  
 185 13. Line 305 of the main text refers to Fig. S9D and not Fig. S9C.

186 14. Line 314 of the main text refers to Fig. 4H.

187 15. Moreover, line 316 and 318 refer to Fig. 4I-I' and S9E instead of Fig.4H and Fig.S9D.  
 188 We thank the reviewer for noticing these typos and have corrected them.

189  
 190 16. How do the ion channel *piezo1* or *piezo2* as mechanosensors affect the emergence of bulge or bud  
 191 in the organoids? Experiments should be conducted using an activator (Yoda-1) or inhibitor (GdCl<sub>3</sub>) of  
 192 these *piezo* channels.

193 We thank reviewer for the question and suggestion.

194 We checked the expression of *piezo1* and *piezo2* in single-cell RNAseq (scRNAseq) data. The expression  
 195 of *piezo1* is rare and randomly distributed in cells from both crypt and villus, while *piezo2* was not  
 196 detected. We further analysed the expression of Piezo proteins by immunostaining with several Piezo1  
 197 and Piezo2 antibodies. Neither Piezo1 or Piezo2 show tissue specific enrichment, nor high expression.  
 198 Piezo1 occasionally exhibits weak expression in a few single cells, which matches the detection of  
 199 mRNA in scRNAseq data (Fig. S11A and B). Due to the low and unspecific tissue expression of Piezo

200 channels, we had not added them as candidates to the list of ion channels for further functional  
201 analysis in previous manuscript.

202

203 Activation of Piezo1 is known to induce cations entry into cell (8), which could increase cellular  
204 osmolarity and reduce lumen volume during crypt budding. Therefore, we tested, as reviewer1  
205 suggested, the activator (Yoda-1) and inhibitor (GdCl<sub>3</sub>) of Piezo1, in addition to another inhibitor  
206 (spider venom peptide, GsMtx4), and performed time-course experiments of organoid development  
207 and crypt formation.

208

209 As expected from the low Piezo expression, inhibiting Piezo channels by GdCl<sub>3</sub> and GsMtx4 did not  
210 show significant defect in lumen shrinkage and crypt budding (Fig. S11C-E). This is in contrast to our  
211 previous data on the inhibition of other ion channels specifically enriched in enterocytes (Sglt-1) or  
212 highly expressed in the whole epithelium (Aquaporins and Na<sup>+</sup>/K<sup>+</sup> ATPase), which had stronger effects  
213 on lumen shrinkage/crypt budding. These results confirm that Piezo1 is not a strong regulator of crypt  
214 morphogenesis in the similar way as Sglt-1, Aquaporins and Na<sup>+</sup>/K<sup>+</sup> ATPase.

215

216 However, activating Piezo1 by Yoda-1 did cause slightly increased lumen volume and reduced  
217 eccentricity (Fig. S11C -E). Previous study of stretch-activated Piezo channel in *Drosophila* mid-gut has  
218 demonstrated the function of Piezo in promoting stem cell differentiation towards the  
219 enteroendocrine lineage (9). Thus, the reduced lumen shrinkage in Yoda-1-treated organoids could  
220 be a consequence of the reduced number of absorptive enterocytes that up-taken the lumen volume.  
221 Indeed, from the detection of enterocyte fate in Yoda-1-treated samples, we observed the reduced  
222 Aldolase B staining of enterocytes in the villus region (Fig. S11C).

223 The data have been added to the manuscript in Fig. S11, text lines 357-366 in page 9.

224

225 Reviewer #2

226 Remarks to the Author:

227 Yang and Xue and colleagues follow up on previous work from the Liberali lab that showed how  
228 intestinal organoids/enteroids break symmetry after initially forming as a uniform cystic structure. In  
229 the current work, the authors focus on the cellular mechanisms that drive the process of bulging and  
230 budding during crypt formation in organoids following this symmetry breaking event. They  
231 demonstrate that apical contraction in crypts and basal tension in the villus generate curvatures  
232 leading to crypt formation, and that enterocytes contribute to this process by swelling.

233

234 Overall this is a strong manuscript. It validates qualitative observations with rigorous quantitative  
235 analysis, and also provides mathematical modeling and theory to describe the observations being  
236 made. Thus, claims made are mostly supported with compelling data.

237 We thank the reviewer for his support and constructive comments, which we address below.

238

239 I had only a handful of comments/critiques/questions:

240

241 Major points:

242

243 Is the differentiation of a Paneth cell at all correlated with apical constriction and crypt formation?  
244 Would crypts/buds form in the absence of PCs, such as in the ATOH1-null epithelium? Certainly  
245 crypts seem to form just fine in genetic ATOH1-null animals; however since this group has attributed  
246 the symmetry breaking (and initiation of bulging/budding) of the cyst in part to PCs, it would be  
247 interesting to know if PC are in any way correlated to Myh-9-GFP in the context of organoid crypt  
248 budding.

249 We thank reviewer for the interesting questions. We do not have access to the ATOH1-null animals,  
250 and we used other experimental procedures to have organoids with reduced Paneth Cell. Therefore,

251 to address this question, we performed new experiments comparing Myh-9-GFP in enterocyst, in  
252 organoids enriched with Paneth cell (PC, treated CHIR+DAPT), or stem cell (SC, treated CHIR+VPA)  
253 (here for simplification, we term the different organoid types as PC organoid and SC organoid) (Fig.  
254 S6). Comparing to enterocysts that have more basal Myh-9-GFP (matching villus tissue in organoids),  
255 the PC organoid and SC organoids all have higher apical Myh-9-GFP signal (Fig. S6C, C' and E).  
256 Interestingly, SC organoids have the highest apical vs. basal Myh-9-GFP ratio, arguing that stem cells  
257 have the highest contribution to spontaneous curvature. Even in the PC organoid, very few Lgr5<sup>+</sup> stem  
258 cells can still remain, and we find that these generate higher regional spontaneous curvature leading  
259 to slight local bulges (Fig. S6A, red arrows). Altogether, these data suggest that stem cells in crypt  
260 tissue are the dominant force creating the actomyosin based apical constriction necessary for  
261 spontaneous curvature, although Paneth cells could of course have a smaller, but non-zero  
262 contribution. We now discuss this in lines 201-214, pages 5-6 of the main text and added these data  
263 in Fig. S6.

264  
265 As a mechanism, the authors explore differential localization of ZO1, Occludin, Claudin2 and N-  
266 cadherin. They observe interesting crypt-specific patterns of Occludin, Claudin2 and N-cadherin  
267 while ZO1 was expressed in the crypt and villus apical surface and in the villus basal surface. They  
268 conclude "However, among them, only ZO-1 overlaps with the basal pool of Myh-9-GFP in organoid  
269 villus region, and exhibits villus basolateral localization both *in vitro* and *in vivo* during crypt  
270 morphogenesis". Yet, the authors do not provide *in vivo* data for Occludin, Claudin2 or N-cadherin.  
271 Moreover, they did not look at any of the markers with high temporal resolution around the time of  
272 crypt emergence *in vivo* (i.e. around Post-natal day 14). It is possible that both basal ZO1 in the villus  
273 region coupled with apical Occludin/Claudin2/N-cadherin in the crypt domain are both important for  
274 the process of actomyosin patterning and crypt budding. It seems that the conclusion that ZO1  
275 contributes to the emergence of the region-specific actomyosin pattern overlooks this possibility.  
276 Some additional immunostaining *in vivo* during the time of crypt formation will be helpful to add this  
277 valuable information.

278 We thank the reviewer for the suggestion, we now tested multiple antibodies against tight junctions  
279 in a new time-course of crypt formation *in vivo*. In the revised manuscript, we present Claudin-2 and  
280 ZO-1 *in vivo* staining at P1, P2, P5, P7, P11, P12, P13, P14, P15, P16, P17 and 6-month-adult stages (Fig.  
281 S6F and G). Unfortunately, Occludin and N-cadherin were not successfully stained in *in vivo* tissue.

282 The data show that Claudin-2 exhibits high apical and weak basolateral localization in the gradually  
283 matured crypt regions. ZO-1 localization was at the apical junction through the whole epithelium, and  
284 enriched at basolateral side in gradually matured villus tissues during development (Fig. S7F and G).  
285 Importantly, these *in vivo* localization patterns of both Claudin-2 and ZO-1 matched well to their  
286 patterns in organoids (Fig. S7E-G), which showed high Claudin-2 at the crypt apical side together with  
287 high ZO-1 at apical junctions and villus basolateral side.

288 We, however, agree with the reviewer that the dual-localization of ZO-1 on the apical side and  
289 basolateral does not mean that only ZO-1 is important for crypt budding and that it is possible that  
290 basal ZO-1 in the villus region coupled with apical Occludin/Claudin-2/N-cadherin in the crypt domain  
291 are both important for the process of actomyosin patterning and crypt budding. We therefore  
292 changed the text in lines 223-231, page 6.

293  
294 For lumen volume experiments that used osmotic shock – the authors should show that cells are viable  
295 and that the cells themselves are not affected by the osmotic shock. Should the osmotic shock affect  
296 the cells themselves (and not just lumen volume), the current interpretation of the experiment would  
297 likely need to be revised.

298 To demonstrate better the change of individual cells with lumen volume reduction, we integrated the  
299 construct of H2B-iRFP reporter into the genome of Lgr5-DTR-GFP organoid and applied osmotic shock  
300 on this Lgr5-DTR-GFP, H2B-iRFP dual-reporter labelled organoid line, and recorded with 3D spinning  
301 disk confocal imaging. Our result demonstrates that before and after osmotic shock, cells were not

302 strongly affected. Yet the Day 3 DMSO-treated roundish organoids are able to bulge, and the Day 3.5  
303 DMSO-treated bulged organoids are able to bud (Fig. S9F).

304

305 Also – for these experiments, the authors concluded “seconds after the osmotic deflation, the Day3.5  
306 organoids formed bulges in the crypt regions enriched in Lgr-5+ stem cells, while the Day2.5 and  
307 Day3.5 CHIR-treated organoids remained spherical and did not display significant bulging”; however,  
308 in the eccentricity measurement, the day 3.5 CHIR showed statistically significant increased  
309 eccentricity after osmotic shock (Fig 8SE – box plot). Is this conclusion at odds with the statistical  
310 analysis?

311 We thank the referee for noticing this. Going back to the data, we found that this slightly increased  
312 eccentricity was because Day 3.5 CHIR treated organoids were already not fully homogeneous as Day  
313 2.5 cysts. Although less differentiated compared to Day 3.5 organoids, some Day 3.5 CHIR-treated  
314 organoids could still have clustered Lgr5<sup>+</sup> stem cells and Paneth cells. Therefore, upon osmotic shock,  
315 Day 3.5 CHIR treated organoids could still bulge a bit and have slightly higher eccentricity than Day 2.5  
316 organoids due to slight differential tissue spontaneous curvature.

317

318 To avoid using partially differentiated Day 3.5 CHIR-treated organoids, we now selected in the revised  
319 manuscript a more homogenous population of Day 3.5 CHIR-treated organoids (based on their  
320 roundish organoid shape and evenly distributed Lgr-5-DTR-GFP). Osmotic shock on these homogenous  
321 Day 3.5 CHIR-treated organoids demonstrated no significant change on eccentricity (Fig. S9F).

322

323 Figure 4D – are the authors claiming that total enterocyst volume does not change? It seems that  
324 lumen volume goes down, cell volume does go up, but total volume goes up initially and then back  
325 down. Can the total loss of lumen volume be accounted for by the increase in cell volume? It does  
326 not seem like cell volume increases sufficiently to account for 100% of lumen volume loss, but this is  
327 something the authors could calculate.

328 We thank the reviewer for the questions.

329 To better address how does the cell (tissue) volume change coordinate with the lumen volume  
330 reduction, in the revised manuscript we increased sample number and calculated the change of the  
331 absolute tissue and lumen volume in each movie of enterocysts. As the reviewer pointed out, from  
332 our calculation, the tissue volume first increases and correlates with lumen volume reduction (total  
333 volume therefore remains or increases slightly) in a highly faithful manner (4 out of 5 measured  
334 enterocysts) (Reviewer Figure). However, in one case the tissue volumes stopped increasing and then  
335 reducing slightly while the lumen volumes kept reducing in the later stage of the movies (Reviewer  
336 Figure A). In such case the cell volume does not increase sufficiently to account for 100% of lumen  
337 volume loss. However, on average the total volume is constant with up to 7% variation.

338

339 In the current version of the manuscript, we re-plotted Fig. 4D with 5 time-lapse recordings and added  
340 explanation of the enterocyte movies in method section.

341

342

343 Minor points:

344

345 Perhaps semantics or differences of word usage in different fields (i.e. biological vs.  
346 mathematical/theoretical), but the authors refer to the change in curvatures that lead to crypt  
347 formation as “spontaneous”; however, their previous work (Serra and Mayr et al.) demonstrated that  
348 the process of symmetry breaking is very stereotyped and reproducible. That is, the  
349 formation/differentiation of a Paneth cell precedes budding. Thus, the word “spontaneous” seems  
350 rather at odds with an active and stereotyped process in the biological sense.

351 We thank the referee for prompting this clarification. We use the word “spontaneous” here in analogy  
352 to the lipid membrane literature, where it doesn’t refer to symmetry-breaking, but is rather



353 synonymous to “intrinsic”, to say that cells with apical myosin, like lipid with different head-tail sizes,  
354 have a preferred curved shape.

355 We have now added a clarification when we first introduce this term, to clarify this synonymous to  
356 “intrinsic”, i.e. the preferred shape (at mechanical equilibrium) of a given stem cell being to be curved  
357 (lines 120-123, page 3).

358  
359 The authors nicely show using LifeAct and Myh-9-GFP, coupled with direct measurements of the  
360 tension in the basal surface of crypts vs. villi that there are differential tensions and localization of  
361 Myh-9-GFP on the basal surface. Assuming that the epithelium of both the crypt and villus region are  
362 interacting with the homogeneous extracellular matrix (Matrigel) during the process of crypt  
363 budding, have the authors examined the interaction of the crypt and villus epithelium with the  
364 surrounding matrix, and is there any evidence that this interaction (i.e. remodeling of matrix  
365 proteins) is correlated with the crypt region vs. the villus region? That is, is the matrix also an active  
366 participant in this process, or a passive bystander that simply gets pushed around by epithelial  
367 forces?

368 We thank the reviewer for the question. To examine the effect of extracellular matrix (ECM)/  
369 remodelling of ECM on crypt budding, we have now performed drug treatment with two broad  
370 spectrum inhibitors of matrix metalloproteinases (MMPs) (GM6001 and Marimastat).

371 Treatment of both MMP inhibitors show that formation and morphologies of crypts were not  
372 significantly different between the MMPi-treated and the DMSO-treated organoids (Fig. S12),  
373 indicating the remodelling of ECM is not required for organoid crypt budding. Moreover, when we  
374 prepared microinjection and micropipette aspiration experiments, removing Matrigel from budded  
375 organoids did not reverse the crypt budding morphology. Taken together, we conclude that in the  
376 scenario of crypt morphogenesis, the matrix does not have a strong mechanical contribution to crypt  
377 budding.

378  
379 In Figure 2B, it will be helpful if the authors label each of the 3 scenarios in the schematic  
380 corresponding to their numerical assignments in the text (i.e. scenario “i”, “ii”, and “iii”).  
381 We have followed the advice and changed in Fig. 2B and figure legend.

382  
383 In the text the authors state: “This provides a key qualitative test of the mechanism we propose: a  
384 mechanism of softer crypts would result in the reverse trend of preferential crypt expansion, a  
385 mechanism of budding via crypt cell proliferation (i.e. buckling) would result in crypt opening as fluid  
386 injection increases the area/volume ratio (22) (see SI Text for detailed discussion).” Here, the  
387 authors state two alternative possibilities to the mechanism they propose. It will be helpful for the  
388 readers if they re-state their proposed mechanism first, and explicitly call the discussion points  
389 above “alternative mechanisms”, which do not fit their model.

390 We followed the advice in the revised text (lines 272-278, page 7) to more clearly state each  
391 scenario sequentially, and remind the readers of the one we propose (spontaneous curvature).

392  
393 For Figure 4A – were enterocysts and CHIR grown organoids given osmotic shock? The section  
394 heading indicates this is the case, but the text and figure legend do not explicitly state they were  
395 treated with osmotic shock.

396 The enterocysts and CHIR grown organoids were not given osmotic shock.

397 Fig. 4A indicates the phenotypes of enterocysts and CHIR-treated organoid in Fig. 4B and C, which are  
398 the growth of enterocysts and CHIR-treated organoids without osmotic shock. These two experiments  
399 reveal enterocytes is the cell type responsible for lumen shrinkage.

400 The “Osmotic changes” in the section heading describes the membrane transporters-driven osmotic  
401 changes in enterocyte that can lead to luminal water relocation.

402  
403 Figure 4 panels are mis-labeled in the text (i.e. figure 4G).

404 [We corrected them in the revised text.](#)

405

406

407 Reviewer #3

408 Remarks to the Author:

409 Summary:

410 In this study, the authors use a 3D organoid culture model to identify a mechanical mechanism for  
411 crypt morphogenesis. The authors examine the effects of actomyosin-driven apical contraction,  
412 villus basal tension, lumen volume and tissue volume on the geometry of organoids with developing  
413 intestinal crypts both experimentally and in a biophysical model. The authors nicely use their model  
414 to guide experimental perturbations that are then used to confirm model predictions and find that  
415 differential spontaneous curvature in the crypt vs. villus region together with lumen volume  
416 reduction can explain the morphological changes during crypt budding. The differential curvature  
417 nicely matches the pattern of myosin localization at the apical side of the bulging crypt and at the  
418 basal side of the villus region leading to increased tension as demonstrated by laser nanosurgery and  
419 micropipette aspiration assays. Upon inflation of the lumen using pharmaceutical and mechanical  
420 methods, budded crypts could not be opened, but less developed bulged crypts could be as  
421 predicted by the model. Furthermore, lumen volume was found to be osmotically redistributed from  
422 the lumen to the enterocytes in the villus region, increasing compressive stress on the crypt and  
423 thereby supporting budding. The authors demonstrated that although the geometry in vivo has an  
424 open lumen, swelling of cells in the villus could still contribute to crypt morphogenesis in vivo. In  
425 conclusion, the authors elegantly overcome the difficulty of studying an internal organ with limited  
426 accessibility by taking advantage of live imaging of intestinal organoids in combination with  
427 biophysical modeling to study the mechanical mechanism of crypt formation.

428

429 Major Points:

430 • The title of the paper comprises the term “cell fate coordinates”, however how cell fate leads to  
431 differential apical actin constriction in the crypt region is not a major focus of the paper. I suggest to  
432 either include more data on how cell fate controls apical constriction and thereby tissue curvature or  
433 rephrase the title to better represent the focus of the paper on apical/basal tension, tissue  
434 curvature, lumen volume and cell swelling.

435 We thank reviewer for the interesting question. To address this question, we performed new  
436 experiments comparing Myh-9-GFP in enterocyst, in organoids enriched with Paneth cell (PC, treated  
437 CHIR+DAPT), or stem cell (SC, treated CHIR+VPA) (here for simplification, we term the different  
438 organoid types as PC organoid and SC organoid) (Fig. S6).

439 Comparing to enterocysts that have more basal Myh-9-GFP (matching villus tissue in budded  
440 organoids), the PC organoid and SC organoids all have higher apical Myh-9-GFP signal (Fig. S12E and  
441 G). Interestingly, SC organoids have the highest apical vs. basal Myh-9-GFP ratio, arguing that stem  
442 cells have the highest contribution to spontaneous curvature. Even in the PC organoid, very few  $Lgr5^+$   
443 stem cells can still remain, and we find that these generate higher regional spontaneous curvature  
444 leading to slight local bulges (Fig. S6A, red arrows). Altogether, these data suggest that stem cells in  
445 crypt tissue are the dominant force creating the actomyosin based apical constriction necessary for  
446 apical constriction, although Paneth cells could of course have a smaller, but non-zero contribution.  
447 We now discuss this in lines 201-214, pages 5-6 of the main text on stem cell fate controlling apical  
448 constriction, and added these data in Fig. S6.

449

450 • Lumen shrinkage and epithelial volume increase are nicely demonstrated. However, the authors do  
451 not discuss the possibility of local differences in cell division contributing to the crypt vs. villus  
452 epithelium differentially. Are there local differences in cell division and if yes, how would they affect  
453 the model?

454 We thank reviewer for prompting us to clarify this question, which we realized was unclear in our  
 455 original submission. Indeed, there are local difference in cell division, with divisions occurring  
 456 predominantly in the crypt regions (as *in vivo*). To test this role, we had used Aphidicolin treatment to  
 457 block mitotic cell division in budded organoids (Fig. S5F). Importantly, their morphology displayed no  
 458 difference with the DMSO-treated organoids. Moreover, we had also used Blebbistatin treatment to  
 459 disrupt contractility, which in contrast significantly disrupt crypt budding. As we make clearer in this  
 460 revised version, this argues against local differences in cell division creating residual stresses in the  
 461 crypt causing it to bulge (as such “division-induced buckling” mechanism should then not be reversed  
 462 by contractility). However, division is indeed indirectly taken into account in our model – which is  
 463 quasi-static given the timescales – through the geometric parameter  $\phi$  (the relative size of the crypt  
 464 domain). This parameter, which we measure independently when fitting the inflation or  
 465 morphogenetic evolution of organoids (Fig. 2 and 3), increases between bulged and budded organoids  
 466 due to divisions in crypts and thus takes into account the difference in division in the model. We  
 467 clarified this by detailing more the theoretical model in main text (lines 186 -187, page 5 and lines 275-  
 468 278, page 7) and in Supplementary (lines 598 - 627, Section 1.5, pages 19-20).

469  
 470 • The authors note that the mesenchyme is important for the formation of villi *in vivo* and say that  
 471 the organoids can form a crypt and villus without mesenchyme. Could the authors discuss possible  
 472 effects of the mesenchyme on crypt morphogenesis *in vivo*, especially how it would impact the  
 473 mechanical landscape? This would be helpful and contextualize the work better in existing work on  
 474 intestinal development (e.g. references 5, 11).

475 This is an interesting point. Whereas crypts are extremely similar between organoid and *in vivo*  
 476 intestine (both in cellular composition and overall shape/morphology) (10), it’s interesting that  
 477 distinct villus shapes are absent in organoids. As villus morphogenesis has been proposed to be  
 478 dependent on buckling from the mesenchyme/smooth muscle(11), while crypt morphogenesis  
 479 occurs much later in development, it is tempting to speculate that mesenchyme could play a stronger  
 480 role in the morphogenesis of the former rather than the latter. We comment on this in the discussion  
 481 of the revised manuscript (lines 408-413, page 10).

482  
 483 Minor Points:

484  
 485 • The term “spontaneous curvature” is central to the manuscript and should be explained to readers  
 486 who are not familiar with this terminology. The term “spontaneous curvature” should be clearly  
 487 separated from the term “spontaneous symmetry breaking” to prevent misunderstandings. If I  
 488 understand correctly, cell fate leads to local differences in tissue curvature and crypts do not form  
 489 because of a spontaneous local increase in curvature at a random position of the spheroid.

490 The referee is perfectly correct in his interpretation – we use the word “spontaneous” here in analogy  
 491 to the lipid membrane literature, but now added a clarification when we first introduce this term that  
 492 it means rather because of an “intrinsic” curvature that is acquired by stem cells (lines 120-123, page  
 493 3).

494  
 495 • One of the major points in the paper is that the spontaneous curvature of the tissue drives  
 496 morphogenesis. However, the curvature of the villus epithelium in the organoids is inverted  
 497 compared to the *in vivo* situation. Could the authors comment/discuss this point?

498 As discussed above, given the reports of villus morphogenesis being dependent on  
 499 mesenchyme/smooth muscle induced buckling, we believe this is why the villus does not show reverse  
 500 curvature (for large organoids the radius of curvature of villus cells will tend to zero, which is the state  
 501 of the pre-buckled intestine *in vivo*). We clarified this together with the previous discussion in lines  
 502 406-413, page 10.

503  
 504 • The authors propose that osmotic transport of fluid into the enterocytes in the villus results in

505 lumen volume reduction. In Supplementary Figure 9, they track crypt and villus cell volume changes.  
 506 A figure showing the volume reduction in the lumen side by side with the total volume increase in  
 507 the villus epithelium (or a similar comparison) would strengthen this point and add additional  
 508 quantification to it.

509 [We thank the referee for this helpful suggestion and have now provided organoid lumen ratio with](#)  
 510 [single-cell volume change in Fig. S10B, and correspondingly put in Fig. S10C the \*in vivo\* re-measured](#)  
 511 [distance between villi based on the same marker staining \(Beta-catenin\).](#)

512  
 513 • Ref. 11 talks about a “hinge” between the villus and crypt. When the authors discuss *in vivo*  
 514 applications of their findings, incorporating a short comment on effects the hinge region would have  
 515 on morphogenesis would be helpful.

516  
 517 [Reference 11 shows at the developmental stage of P20, Rac1 prevents integrin-guided](#)  
 518 [hemidesmosomal attachment of epithelium to ECM, which allows cell basal constriction at the crypt](#)  
 519 [border, resulting in proper villar spacing after crypt budding \(12\). However, Rac1 loss-of-function at](#)  
 520 [earlier stages did not cause any defect in crypt morphogenesis. We therefore think that hinge cells are](#)  
 521 [likely to be important to stabilize crypt shape at later stages than the ones we consider here. This](#)  
 522 [could in principle be modelled by the “boundary” term that we had included in our energy to represent](#)  
 523 [possible specific mechanical contributions of the crypt-villus boundary. We now discuss this in lines](#)  
 524 [392-396, page 10 of the revised discussion.](#)

525  
 526 • Figure 2D: The figure panels are very small. Please increase the size by using empty white space in  
 527 the figure to allow the reader to see the nanosurgery experiments.

528 • Figure 2D’’: The error bars overlap and are not easy to read. Incorporating a design similar to Fig. 1E  
 529 would improve readability.

530 • Figure 2E: Include a panel showing a zoom-in onto the micropipette so that the reader can see the  
 531 difference in basal tension in the crypt vs vilus region.

532 [We have followed the advices.](#)

533  
 534 • Figure 2F, F’, F’’, F’’’: The authors show an image of basal Myh-9-GFP intensity in the villus and crypt,  
 535 but do not quantify or directly compare the two, instead incorporating them into an overall intensity  
 536 in F’’. A figure similar to F’ but for the basal side would be helpful to compare myosin between the  
 537 two regions on the basal side (presumably important for maintaining villus tension).

538 [We thank the referee for his careful reading of the figures. We quantified the basal Myh-9-GFP in](#)  
 539 [different stages and integrated the plot into Fig. 2G.](#)

540  
 541 • Figure 2 legend: The legend is very long. Consider shortening for example by moving information  
 542 about method details (for the micropipette aspiration assay) to the method section rather than the  
 543 figure legend.

544 [We have followed the advice.](#)

545  
 546 • Methods section: please make sure to explain abbreviations used such as FCN  
 547 • Typos in the text:

- 548 o Line 61: “Day3” and “Day4” are missing blanks
- 549 o Line 137: There is no Fig. 2C’’’. Please refer to the correct figure panel.
- 550 o Line 151: Fig. 2D-D’’ should read Fig. 2D-D’’’.
- 551 o Line 314: “Fig. 4G” should be replaced with “Fig. 4H”.
- 552 o Line 318: “Fig. 4H” should be replaced with “Fig. 4I”.

553 [We thank the referee for pointing these and have corrected these typos and abbreviation](#)  
 554 [definitions.](#)

555

## 556 Reference:

557

558 1. M. D. Muzumdar, B. Tasic, K. Miyamichi, L. Li, L. Luo, A global double-fluorescent Cre reporter  
559 mouse. *genesis*. **45**, 593–605 (2007).

560 2. B. Zhao *et al.*, The non-muscle-myosin-II heavy chain Myh9 mediates colitis-induced  
561 epithelium injury by restricting Lgr5+ stem cells. *Nature Communications*. **6**, 7166–12 (2015).

562 3. D. Serra *et al.*, Self-organization and symmetry breaking in intestinal organoid development.  
563 *Nature*. **569**, 66–72 (2019).

564 4. M. A. Odenwald, J. R. Turner, The intestinal epithelial barrier: a therapeutic target? *Nat Rev*  
565 *Gastroenterol Hepatol*. **14**, 9–21 (2017).

566 5. M. González-González *et al.*, Investigating Gut Permeability in Animal Models of Disease.  
567 *Front Physiol*. **9**, 1962 (2018).

568 6. C. J. Chan *et al.*, Hydraulic control of mammalian embryo size and cell fate. *Nature*. **571**, 112–  
569 116 (2019).

570 7. A. I. Masyuk, R. A. Marinelli, N. F. LaRusso, Water transport by epithelia of the digestive tract.  
571 *Gastroenterology*. **122**, 545–562 (2002).

572 8. B. Coste *et al.*, Piezo1 and Piezo2 are essential components of distinct mechanically activated  
573 cation channels. *Science*. **330**, 55–60 (2010).

574 9. L. He, G. Si, J. Huang, A. D. T. Samuel, N. Perrimon, Mechanical regulation of stem-cell  
575 differentiation by the stretch-activated Piezo channel. *Nature*. **555**, 103–106 (2018).

576 10. T. Sato, H. Clevers, Growing self-organizing mini-guts from a single intestinal stem cell:  
577 mechanism and applications. *Science*. **340**, 1190–1194 (2013).

578 11. A. E. Shyer, T. R. Huycke, C. Lee, L. Mahadevan, C. J. Tabin, Bending gradients: how the  
579 intestinal stem cell gets its home. *Cell*. **161**, 569–580 (2015).

580 12. K. D. Sumigray, M. Terwilliger, T. Lechler, Morphogenesis and Compartmentalization of the  
581 Intestinal Crypt. *Dev. Cell*. **45**, 183–197.e5 (2018).

582

583

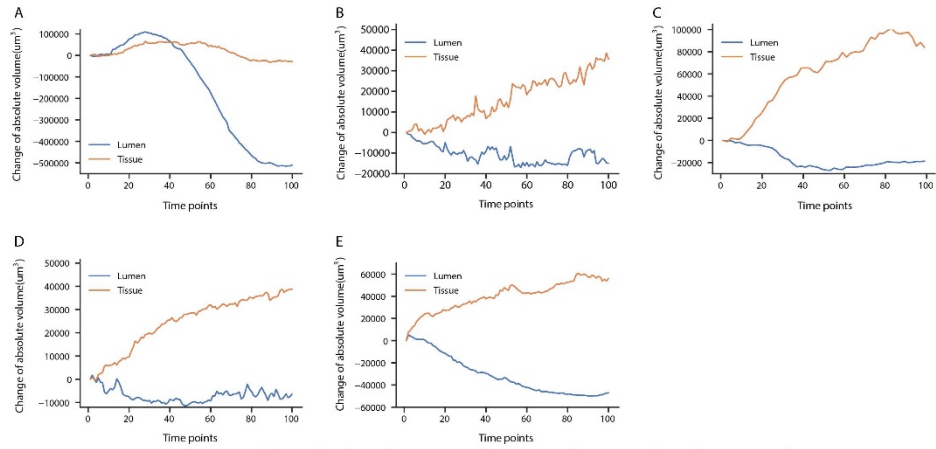

584  
 585 **Reviewer Figure.** Change of the absolute lumen and tissue volume in development of enterocysts. **A**  
 586 – **E** plot the volume dynamics of each individual enterocyst.

**Decision Letter, first revision:****Date:** 18th March 21 07:32:57**Last Sent:** 18th March 21 07:32:57**Triggered By:** Christine Weber**From:** christine.weber@nature.com**To:** prisca.liberali@fmi.ch**CC:** ncb@springernature.com**Subject:** Your manuscript, NCB-L43714A**Message:** Dear Prisca,

Thank you for submitting your revised manuscript "Cell fate coordinates mechano-osmotic forces in intestinal crypt formation" (NCB-L43714A) to Nature Cell Biology.

It has now been seen by the original referees and their comments are below. As you will see, the reviewers find that the paper has been improved in revision, and therefore we'll be happy in principle to publish it in Nature Cell Biology, pending minor revisions to satisfy referee 1's final request and to comply with our editorial and formatting guidelines.

We are now performing detailed checks on your paper and will send you a checklist detailing our editorial and formatting requirements in 1-2 weeks. Please do not upload the final materials and make any revisions until you receive this additional information from us.

As the current version of your manuscript is in a PDF format, please email us a copy of the file in an editable format (Microsoft Word or LaTeX) -- we cannot proceed with PDFs at this stage.

Thank you again for your interest in Nature Cell Biology. Please do not hesitate to contact me if you have any questions.

With best wishes,

Christine.

Christine Weber, PhD  
Senior Editor  
Nature Cell Biology  
E-mail: christine.weber@nature.com  
Phone: +44 (0)207 843 4924

-----  
Reviewer #1 (Remarks to the Author):

The authors have done a nice job in addressing my concerns. The only minor comment is that the typo introduced in the conversion of the equations (line 362 and 379 of the Supplementary information) has not been corrected yet.

Reviewer #2 (Remarks to the Author):

The authors have nicely addressed every criticism from this reviewer. An already strong manuscript is now even better, and I believe that it is suitable for publication in Nature Cell Biology.

Reviewer #3 (Remarks to the Author):

The authors have satisfactorily addressed the reviewer concerns. The revised manuscript provides an excellent description of the mechanisms by which crypts form in intestinal organoids.

**Author Rebuttal, first revision:**

Reviewer #1:

Remarks to the Author:

The authors have done a nice job in addressing my concerns. The only minor comment is that the typo introduced in the conversion of the equations (line 362 and 379 of the Supplementary information) has not been corrected yet.

We thank the referee for pointing the typo and have corrected it for equation 6 (line 85) and equation 7 (line 102) in the current version of the supplementary note file.

**Final Decision Letter:**

Dear Prisca,

I am pleased to inform you that your manuscript, "Cell fate coordinates mechano-osmotic forces in intestinal crypt formation", has now been accepted for publication in Nature Cell Biology.

Thank you for sending us the final manuscript files to be processed for print and online production, and for returning the manuscript checklists and other forms. Your manuscript will now be passed to



our production team who will be in contact with you if there are any questions with the production quality of supplied figures and text.

In approximately 10 business days you will receive an email with a link to choose the appropriate publishing options for your paper and our Author Services team will be in touch regarding any additional information that may be required.

You will not receive your proofs until the publishing agreement has been received through our system.

If you have any questions about our publishing options, costs, Open Access requirements, or our legal forms, please contact [ASJournals@springernature.com](mailto:ASJournals@springernature.com)

Before the manuscript is sent to our printers, we will make changes in the text that may be necessary either to make it conform with house style or to make it intelligible to our wide readership. We look particularly carefully at the titles of all papers to ensure that indexing will be accurate and that they are not unreasonably long. We will ask your approval before the copy is finalized, and you will soon receive the edited proofs. Please check the text and figures carefully. Once your manuscript is typeset and you have completed the appropriate grant of rights, you will receive a link to your electronic proof via email with a request to make any corrections within 48 hours. If, when you receive your proof, you cannot meet this deadline, please inform us at [rjsproduction@springernature.com](mailto:rjsproduction@springernature.com) immediately.

Once your paper has been scheduled for online publication, the Nature press office will be in touch to confirm the details. An online order form for reprints of your paper is available at <https://www.nature.com/reprints/author-reprints.html>. All co-authors, authors' institutions and authors' funding agencies can order reprints using the form appropriate to their geographical region.

Publication is conditional on the manuscript not being published elsewhere and on there being no announcement of this work to any media outlet until the online publication date in *Nature Cell Biology*.

Please note that *Nature Cell Biology* is a Transformative Journal (TJ). Authors may publish their research with us through the traditional subscription access route or make their paper immediately open access through payment of an article-processing charge (APC). Authors will not be required to make a final decision about access to their article until it has been accepted. [Find out more about Transformative Journals](#)

**Authors may need to take specific actions to achieve [compliance](#) with funder and institutional open access mandates.** For submissions from January 2021, if your research is supported by a funder that requires immediate open access (e.g. according to [Plan S principles](#)) then you should select the gold OA route, and we will direct you to the compliant route where possible. For authors selecting the subscription publication route our standard licensing terms will need to be accepted, including our [self-archiving policies](#). Those standard licensing terms will supersede any other terms that the author or any third party may assert apply to any version of the manuscript.

To assist our authors in disseminating their research to the broader community, our SharedIt initiative provides you with a unique shareable link that will allow anyone (with or without a subscription) to read the published article. Recipients of the link with a subscription will also be able to download and print the PDF.

If your paper includes color figures, please be aware that in order to help cover some of the additional cost of four-color reproduction, Nature Research charges our authors a fee for the printing of their color figures. Please contact our offices for exact pricing and details.

As soon as your article is published, you will receive an automated email with your shareable link.

If you have not already done so, we strongly recommend that you upload the step-by-step protocols used in this manuscript to the Protocol Exchange ([www.nature.com/protocolexchange](http://www.nature.com/protocolexchange)), an open online resource established by Nature Protocols that allows researchers to share their detailed experimental know-how. All uploaded protocols are made freely available, assigned DOIs for ease of citation and are fully searchable through nature.com. Protocols and the Nature and Nature research journal papers in which they are used can be linked to one another, and this link is clearly and prominently visible in the online versions of both papers. Authors who performed the specific experiments can act as primary authors for the Protocol as they will be best placed to share the methodology details, but the Corresponding Author of the present research paper should be included as one of the authors. By uploading your Protocols to Protocol Exchange, you are enabling researchers to more readily reproduce or adapt the methodology you use, as well as increasing the visibility of your protocols and papers. You can also establish a dedicated page to collect your lab Protocols. Further information can be found at [www.nature.com/protocolexchange/about](http://www.nature.com/protocolexchange/about)

You can use a single sign-on for all your accounts, view the status of all your manuscript submissions and reviews, access usage statistics for your published articles and download a record of your refereeing activity for the Nature journals.

Please feel free to contact us if you have any questions.
