# Supplementary material
Source: PubMed Central journal article supplement (PMC7611267)
Supplement: EMS124566-supplement-Supplementary_Note.pdf [file EMS124566-supplement-Supplementary_Note.pdf]

1  
2  
3 **Supplementary Note for**

4 **Cell fate coordinates mechano-osmotic forces in intestinal crypt formation**

5 Qiutan Yang<sup>1†\*</sup>, Shi-Lei Xue<sup>2†</sup>, Chii Jou Chan<sup>3,4</sup>, Markus Rempfler<sup>1</sup>, Dario Vischi<sup>1</sup>, Francisca  
6 Maurer Gutierrez<sup>1</sup>, Takashi Hiiragi<sup>5</sup>, Edouard Hannezo<sup>2\*</sup>, Prisca Liberali<sup>1,6\*</sup>

7  
8 <sup>1</sup>Friedrich Miescher Institute for Biomedical Research (FMI), Maulbeerstrasse 66, 4058 Basel,  
9 Switzerland

10 <sup>2</sup>Institute of Science and Technology Austria, Am Campus 1, 3400 Klosterneuburg, Austria

11 <sup>3</sup>Mechanobiology Institute, National University of Singapore, 117411, Singapore

12 <sup>4</sup>Department of Biological Sciences, National University of Singapore, 117558, Singapore

13 <sup>5</sup>European Molecular Biology Laboratory, Meyerhofstrasse 1, 69117 Heidelberg, Germany

14 <sup>6</sup>University of Basel, Petersplatz 1, 4001 Basel, Switzerland

15 <sup>†</sup>These authors contributed equally: Qiutan Yang, Shi-Lei Xue

16 <sup>\*</sup> Correspondence to: [prisca.liberali@fmi.ch](mailto:prisca.liberali@fmi.ch) ; [edouard.hannezo@ist.ac.at](mailto:edouard.hannezo@ist.ac.at); [qiutan.yang@fmi.ch](mailto:qiutan.yang@fmi.ch)

17  
18

19 In this Supplementary Note, we provide details on our physical model for the  
20 morphogenesis of intestinal organoids. The organoid is treated as a closed epithelial monolayer  
21 with two distinct regions, encapsulating an incompressible fluid lumen. We develop a three-  
22 dimensional biophysical model to study the mechanics of organoids and use it to derive  
23 analytical results of specific morphologies, i.e., bulged and budded shapes, concentrating in  
24 particular on the impacts of crypt apical constriction and lumen volume changes on  
25 morphogenesis.

## 26 **1. Two-region vertex model**

27 The macroscopic shape of epithelial tissues and organs can be understood from  
28 mechanical interactions at the cellular level, such as cell-cell adhesion and actomyosin-  
29 mediated tension along the cell membrane. Vertex models are a class of multiscale mechanical  
30 models to understand the interplay between cellular mechanical forces and tissue-scale  
31 deformation (1-3). In vertex models, tissue is described as a set of vertices, where each vertex  
32 represents a tri-cellular junction that cell edges meet at, and on which force balance is written  
33 (taking into account forces such as surface tensions, line tensions, internal fluid pressure, and  
34 external forces from surrounding environment).

35 An intestinal organoid is initially a spherical epithelial monolayer with a central luminal  
36 fluid cavity. After symmetric breaking which creates segregated stem cell and differentiated  
37 cell regions, the organoid will evolve towards pear-shaped configurations composed of two  
38 regions, crypt and villus. For simplicity, each region in the model is treated as a spherical cap.  
39 In the following, we first discuss the free energy of a single cell in the monolayer, then get the  
40 total energy of the whole organoid.

### 41 **1.1. Free energy of a single cell**

42 Consider a single cell with three surface tensions  $\Gamma_a$ ,  $\Gamma_b$ , and  $\Gamma_l$ , and three surface areas  
43  $A_a$ ,  $A_b$ , and  $A_l$ , where the subscripts  $a$ ,  $b$ , and  $l$  respectively represent apical, basal, and  
44 lateral surfaces/domains (Fig. 2A). Then, the free energy of a single cell is

$$45 \quad f = \Gamma_a A_a + \Gamma_b A_b + \frac{1}{2} \Gamma_l A_l, \quad (1)$$

46 The apical and basal surfaces are simplified as squares with side lengths  $d_a$  and  $d_b$  (although  
47 more complex shape would give identical results up to pre-factors). With the height of a cell  
48 as  $h$ , the free energy (1) becomes

49 
$$f = \Gamma_a d_a^2 + \Gamma_b d_b^2 + \Gamma_l h(d_a + d_b). \quad (2)$$

50 Each region is treated as a part of a homogeneous sphere shell, which has total cell number  
 51  $N'$ . In the spherical region, the side lengths are related to the region radii, i.e.  $d_a = \sqrt{4\pi/N'}R_a$ ,  
 52  $d_b = \sqrt{4\pi/N'}R_b$ , where  $R_a$  and  $R_b$  are the inner (apical) and outer (basal) radii, respectively.  
 53 Moreover, we have  $R_a = R - h/2$ ,  $R_b = R + h/2$ , where  $R$  is the neutral radius (see Extended  
 54 Data Fig. 2A for a schematic). Then, the free energy can be rewritten as

55 
$$f = \frac{4\pi}{N'} [(\Gamma_a + \Gamma_b)R^2 + (\Gamma_b - \Gamma_a)Rh] + 2\sqrt{\frac{4\pi}{N'}} \cdot \Gamma_l Rh. \quad (3)$$

56 For simplicity, a thin-film assumption is employed, which means the thickness of the  
 57 spherical sheet is much smaller than its radius, i.e.  $(h/R)^2 \ll 1$  ( $R/h$  is typically larger than  
 58 2, as we subsequently measure this ratio to fit the morphogenetic evolution and organoid lumen  
 59 inflation, see Subsection 4.2.1 for further details), which leads to  $N'V_{e0} = 4\pi R^2 h \left[ 1 + \frac{1}{12} \left( \frac{h}{R} \right)^2 \right] \approx 4\pi R^2 h$ ,  
 60 where  $V_{e0}$  is the cell volume. This greatly simplifies the analytics, as it yields  
 61  $h \approx N'V_{e0} / (4\pi R^2)$ . Given that cell volume is under osmotic regulation, involving stresses  
 62 much larger than the ones produced by actomyosin (4), it is reasonable to assume that the  
 63 volume  $V_{e0}$  is independent from tension forces. However, cell volume may change during  
 64 villus cell differentiation, due to active osmotic regulation, which will be discussed in  
 65 Subsection 1.4. Under these assumptions, the free energy is only related to radius  $R$  :

66 
$$f(R) \approx \frac{4\pi}{N'} (\Gamma_a + \Gamma_b) R^2 + \left[ (\Gamma_b - \Gamma_a) + 2\Gamma_l \sqrt{\frac{N'}{4\pi}} \right] \frac{V_{e0}}{R}, \quad (4)$$

67 and the corresponding neutral radius in free state  $\tilde{R}$  should satisfy  $\left. \frac{\partial f}{\partial R} \right|_{\tilde{R}} = 0$ , which leads to

68 
$$\tilde{R} = \sqrt{\frac{N'}{4\pi}} \left( \frac{V_{e0}\Gamma_l}{\Gamma_a + \Gamma_b} \right)^{\frac{1}{3}} \left( 1 + \frac{\Gamma_b - \Gamma_a}{2\Gamma_l} \sqrt{\frac{4\pi}{N'}} \right)^{\frac{1}{3}}. \quad (5)$$

69 Using Eq. (5), free energy (4) can be recast as

70 
$$f \approx \frac{4\pi}{N'} (\Gamma_a + \Gamma_b) R^2 \left[ 1 + 2 \left( \frac{\tilde{R}}{R} \right)^3 \right]. \quad (6)$$

71 Using Eq. (6) and introducing the deformation ratio  $\lambda = R / \tilde{R}$ , we can further get the free  
 72 energy density  $f/V_{e0} = \frac{4\pi(\Gamma_a + \Gamma_b)\tilde{R}^2}{N'V_{e0}} (\lambda^2 + 2\lambda^{-1})$ , which indicates that  $4\pi(\Gamma_a + \Gamma_b)^2 \tilde{R}^2 / (N'V_{e0})$  acts

73 as the stiffness of the spherical epithelium. For a large spherical monolayer ( $N'$  is a large  
74 number), we can neglect the term of apico-basal difference in Eq. (5), and approximate the  
75 stiffness as  $(\Gamma_a + \Gamma_b)^{1/3} \Gamma_l^{-2/3} V_{e0}^{-1/3}$ , emphasizing the crucial role for the sum of apical and basal  
76 tensions in setting in-plane resistance to deformations (which will become crucial to compare  
77 the respective responses of villus and crypt regions to lumen inflation, see Fig. 5 of the main  
78 text).

## 79 1.2. Free energy of a two-region organoid epithelium

80 The free energy of the whole organoid is the sum of free energies in two regions. For  
81 simplicity, every cell in each region is assumed to be the same. Then, the free energy of a two-  
82 region epithelium is  $F = N_c f_c + N_v f_v$ , where  $N_i$  and  $f_i$  are respectively cell number and  
83 cellular free energy in region  $i$ , with the index  $i = c, v$  denoting respectively crypt and villus.  
84 Using Eq. (6), the free energy of a single cell in region  $i$  is  
85  $f_i \approx (4\pi / N'_i)(\Gamma_a + \Gamma_b)_i R_i^2 \left[ 1 + 2 \left( \tilde{R}_i / R_i \right)^3 \right]$ , and corresponding free energy of the whole  
86 epithelium yields

$$87 \quad F \approx 4\pi (\Gamma_a + \Gamma_b)_c \frac{N_c}{N'_c} R_c^2 \left[ 1 + 2 \left( \frac{\tilde{R}_c}{R_c} \right)^3 \right] + 4\pi (\Gamma_a + \Gamma_b)_v \frac{N_v}{N'_v} R_v^2 \left[ 1 + 2 \left( \frac{\tilde{R}_v}{R_v} \right)^3 \right]. \quad (7)$$

88 A number of parameters in Eq. (7) can be eliminated as many geometric variables (such  
89 as  $N_i$ ,  $N'_i$ , and  $R_i$ ) are related. Firstly, we have organoid volume  $V = V_c + V_v$ , where  
90  $V_i = \pi R_i^3 (2 + 3 \cos \theta_i - \cos^3 \theta_i) / 3$  is the volume of region  $i$ . For simplicity, we introduce an  
91 equivalent organoid radius  $R_t$  satisfying  $V = 4\pi R_t^3 / 3$ , and considering the geometric relation  
92  $R_c \sin \theta_c = R_v \sin \theta_v$ , then the region radius  $R_i$  is related to radius  $R_t$  and polar angles  $\theta_i$  (see  
93 Extended Data Fig. 2B for schematic) by

$$94 \quad R_i = R_t g_i^{-1/3}, \quad (8)$$

95 with

$$96 \quad g_c = \frac{1}{2} \left[ \left( 1 + \frac{3}{2} \cos \theta_c - \frac{1}{2} \cos^3 \theta_c \right) + \left( \frac{\sin \theta_c}{\sin \theta_v} \right)^3 \left( 1 + \frac{3}{2} \cos \theta_v - \frac{1}{2} \cos^3 \theta_v \right) \right], \quad (9)$$

$$g_v = \left( \frac{\sin \theta_c}{\sin \theta_v} \right)^{-3} g_c$$

97 Secondly, considering cells in one region have the same geometric shape, the ratio of cell  
 98 number in the region (which is a spherical cap) to that in the whole spherical shell is  
 99 proportional to the ratio of surface areas, that is  $N_i / N'_i = A_i / A'_i$ , where the surface area of  
 100 region  $i$  is  $A_i = \pi R_i^2 (2 + 2 \cos \theta_i)$ , and the surface are of corresponding spherical shell is  
 101  $A'_i = 4\pi R_i^2$ . Then we can get

$$102 \quad \frac{N_i}{N'_i} = \frac{1}{4} s_i, \quad (10)$$

103 where  $s_i(\theta_i) = 2 + 2 \cos \theta_i$ .

104 An intestinal organoid evolves from an initial spherical shape toward a two-region  
 105 configuration. Crypt apical constriction is found to initiate intestinal morphogenesis *in vivo*,  
 106 and apical surface areas of crypt cells also reduce during the development of intestinal  
 107 organoids (Fig. 1B). In view of these, we consider that tensions in crypt cells may be distinct  
 108 from those of villus cells, and evaluate the role of crypt mechanics in organoid morphogenesis.  
 109 Given that intestinal organoid initially contains identical cell types, prior to the symmetry  
 110 breaking of fate (5), we take all cells to initially have the same surface tensions. For simplicity,  
 111 we assume that there is no apical-basal tension difference for an initial spherical organoid, and  
 112 further assume that lateral tensions are unchanged everywhere during development, i.e.  
 113  $\Gamma_{lc} = \Gamma_{lv} = \Gamma_l$ . This assumption was experimentally verified by examining Myosin levels on  
 114 the lateral surfaces of villus and crypt cells at different time points (Fig. 3B), which makes our  
 115 choice of non-dimensionalizing tension by lateral tensions natural. We also note that even if  
 116 lateral tensions did change, e.g. crypt budding driven by increased lateral tension in crypts, this  
 117 would still be encapsulated in the three classes of mechanisms discussed in the main text (in  
 118 the case of increased lateral tension in crypts, all things equals otherwise, this is similar to  
 119 decreasing the in plane contraction in crypts). Then, we can non-dimensionalize Eq. (7) by  
 120 introducing four dimensionless parameters:

- 121 - relative region size of the crypt  $\varphi = N_c / N_t (N_t = N_c + N_v)$ , which can evolve at  
 122 different stages (spherical, bulged, budded) given the preferential proliferation of  
 123 crypt cells.
- 124 - in-plane contraction ratio  $\alpha = (\Gamma_a + \Gamma_b)_c / (\Gamma_a + \Gamma_b)_0$ , which quantifies the relative  
 125 changes in crypt stiffness due to changes of apical/basal tensions.
- 126 - normalized organoid radius  $\beta = R_t / \tilde{R}_0$ , where  $\tilde{R}_0$  is the radius of the initial spherical

127 organoid in free state,

128 - normalized apico-basal tension difference  $\gamma_c = \frac{1}{2} \left( \frac{\Gamma_b - \Gamma_a}{\Gamma_l} \right)_c \sqrt{\frac{4\pi}{N_l}}$ , which causes the crypt  
 129 to have a spontaneous curvature.

130 Submitting Eqs. (8) and (10) into Eq. (7), the dimensionless free energy  
 131  $\hat{F} = F / \left[ \pi (\Gamma_a + \Gamma_b)_0 \tilde{R}_0^2 \right]$  becomes

$$132 \quad \hat{F} \approx \alpha \beta^2 \cdot s_c g_c^{-2/3} \left[ 1 + \frac{2}{\beta^3} \left( \frac{\tilde{R}_c}{\tilde{R}_0} \right)^3 g_c \right] + \beta^2 \cdot s_v g_v^{-2/3} \left[ 1 + \frac{2}{\beta^3} \left( \frac{\tilde{R}_v}{\tilde{R}_0} \right)^3 g_v \right], \quad (11)$$

133 where  $(\tilde{R}_c / \tilde{R}_0)^3 = 8\alpha^{-1} \varphi^{3/2} s_c^{-3/2} (1 + \varphi^{-1/2} s_c^{1/2} \gamma_c / 2)$ ,  $(\tilde{R}_v / \tilde{R}_0)^3 = 8(1 - \varphi)^{3/2} s_v^{-3/2}$ .

134 To simplify the expression, we redefine geometric parameters  $G_c(\theta_c, \theta_v) = s_c^{-3/2} g_c$ ,  
 135  $G_v(\theta_c, \theta_v) = s_v^{-3/2} g_v$  (which quantify the degree of opening of villus and crypt regions), and  
 136 introduce the normalized volume  $v = \beta^3$ . The free energy then reads

$$137 \quad \hat{F} \approx v^{2/3} (\alpha G_c^{-2/3} + G_v^{-2/3}) + 16v^{-1/3} \left[ \varphi^{3/2} G_c^{1/3} + (1 - \varphi)^{3/2} G_v^{1/3} + \frac{1}{2} \varphi g_c^{1/3} \gamma_c \right]. \quad (12)$$

138 Eq. (12) shows that  $\hat{F}$  is a function of only two parameters, i.e. the polar angles  $\theta_c$  and  
 139  $\theta_v$ , with the minima of  $\hat{F}$  (and corresponding  $\theta_c$  and  $\theta_v$ ) determining the shape of organoids  
 140 at mechanical equilibrium. In principle, in-plane contraction ( $\alpha$ ), spontaneous curvature ( $\gamma_c$ ),  
 141 lumen volume ( $v$ ), and crypt size ( $\varphi$ ) can all affect organoid morphogenesis, and we first  
 142 sequentially explored the influence of each of these parameters separately, to gain intuitive  
 143 insights into their influence on morphology, which can then be verified in experimental data.  
 144 Finally, to avoid non-physical minima of this energy, we employed a penalty function to  
 145 guarantee the inner radii of crypt and villus are always positive, i.e.  $R_{ai} = R_i - h_i/2 > 0$ . In the  
 146 calculation, we use  $\exp \left\{ \eta \left[ (v / g_i)^{1/3} - (2\varphi / \tilde{\kappa}_0) (v / G_i)^{-2/3} \right] \right\}$  as a penalty function, where  $\eta$  is  
 147 chosen as  $-10^5$ ,  $\tilde{\kappa}_0 = 4\pi \tilde{R}_0^3 / (N_l V_{e0})$  is a shape factor that characterizes the initial volume ratio  
 148 between the whole organoid and the epithelial monolayer.

### 149 1.2.1. Organoid morphologies

150 We first study the organoid morphologies with varied volume  $v$  and spontaneous  
 151 curvature  $\gamma_c$  (of crypt region), with  $\alpha = 1$  (equal in-plane contraction in villus and crypt

152 regions). Setting  $\alpha = 1$  and crypt size  $\varphi = 0.2$ , the phase diagram in Extended Data Fig. 2D  
153 not only highlights the influence of spontaneous curvature, but also intuitively reveals that the  
154 inflation of organoids tends to reopen both the crypt and villus and recover the original  
155 spherical shape. In other words, transformation from a budded shape to a bulged one may  
156 happen during organoid inflation. This is consistent with classical theoretical result on lipid  
157 vesicles with regions of spontaneous curvature, which shows that an increase in vesicle volume  
158 will reverse the budding induced by spontaneous curvature (6). Examining organoid  
159 morphology with  $\gamma_c = -0.25$  in the first graph of Extended Data Fig. 2D as an example, its  
160 crypt is fully closed under moderate volume expansion, but will open up when the lumen  
161 volume increases above a critical threshold. We employed the “degree of crypt opening”,  
162 defined as  $\theta_c / (\pi - \theta_v)$ , to quantify the morphogenesis of intestinal organoid. This parameter  
163 ranges from 0 to 1, where 0 corresponds to the budded shape with crypt and villus fully closed  
164 and 1 to a fully spherical organoid shape.

165 As shown in Extended Data Fig. 2D, the in-plane contraction in crypt also affects the  
166 organoid morphology. Interestingly, examining organoid morphology without spontaneous  
167 curvature (i.e.  $\gamma_c = 0$ ), we can find weak in-plane crypt contraction ( $\alpha < 1$ ) can lead to a  
168 partially closed crypt. Even without out-of-plane bending, a decrease in in-plane contraction  
169 will tend to expand the crypt (by increasing the rest length of crypt cells, or decrease their  
170 preferred height). However, the total volume enclosed by the organoid (lumen) is set, so that  
171 this mismatch between preferred cell area and lumen volume can engender compressive  
172 stresses inside the monolayer and result in a buckling instability (as discussed in Fig. 2B,  
173 Extended Data Fig. 3A and main text). Thus, although this cannot occur for swollen organoids,  
174 organoids with small lumen volume could conceivably undergo crypt cell-driven buckling  
175 from low in-plane contraction in crypts. Importantly however, this then predicts features upon  
176 lumen expansion which are very different from the data (Fig. 5). Generally, in the presence of  
177 spontaneous curvature, for an organoid with weak in-plane crypt contraction ( $\alpha < 1$ ), the  
178 original spherical shape is recovered by lumen volume expansion, while the recovery is harder  
179 when the crypt has strong in-plane contraction ( $\alpha > 1$ ). Strikingly, we find that a crypt with a  
180 large enough spontaneous curvature may not open up even for arbitrarily large increases in  
181 lumen volume. This indicates critical mechanical forces in crypt may exist, beyond which the  
182 shape transformation back to spherical shapes never happens.

183

### 184 1.2.2. Morphometric parameters

185 Upon organoid swelling, the crypt and villus sustain distinct in-plane and out-of-plane  
186 deformations, which respectively modulate the thickness and radius of each region. In other  
187 words, these geometric quantities can be employed as morphometric parameters to evaluate  
188 the mechanical deformations (and corresponding cell tensions) in two regions. For example,  
189 profiles of epithelial thickness and radius have been proposed as metrics to infer the nature of  
190 forces driving epithelial folds in epithelium-stroma structures (7). We thus examine thickness  
191 ratio  $h_c / h_v$  and radius ratio  $R_c / R_v$  to further quantify the morphological evolution during  
192 volume expansion. We find in particular that their dependence on two mechanical parameters,  
193 i.e., in-plane contraction  $\alpha$  and spontaneous curvature  $\gamma_c$ , is qualitatively different (Extended  
194 Data Fig. 2E-H). The thickness (or radius) ratio shows two distinct trends during organoid  
195 inflation. For an organoid with  $\alpha = 1, \gamma_c = -0.25$ , the thickness ratio increases almost linearly  
196 with volume expansion at the early stage, but drops abruptly at  $v \approx 2$ , while its radius ratio  
197 also undergoes both linear and nonlinear variations, but in an opposite way (Extended Data Fig.  
198 2F). These abrupt transitions of thickness and radius ratios are due to shape transformation of  
199 organoids (Extended Data Fig. 2D), and clearly indicate that, for organoids with different  
200 morphologies, the thickness (or radius) ratio is modulated by lumen volume in distinct ways.  
201 Furthermore, we find that crypts with strong in-plane contraction (i.e.,  $\alpha > 1$ ) are always  
202 thicker than villi (Extended Data Fig. 2E and G), while crypts with  $\alpha < 1$  is usually thinner  
203 than villi (Extended Data Fig. 2E, H and 3A). This is intuitive as hydrostatic pressure is uniform  
204 within the organoid lumen, so that stiffer regions deform less than softer ones (resulting in less  
205 thinning). We also find that the inflation of organoids tends to widen the thickness difference  
206 between two regions (Extended Data Fig. 2E, G and H), as the softer region tends to  
207 accommodate the bulk of the pressure-induced deformation.

208 Furthermore, as already shown in Fig. 2B, spontaneous curvature  $\gamma_c$  always tends to  
209 increase the crypt thickness. This is consistent with results in *Drosophila* gastrulation, where  
210 ventral cells are lengthened during furrow formation (8). However, Extended Data Fig. 2F-H  
211 further indicate that, for a swelling organoid, the influence of  $\gamma_c$  on the thickness ratio  $h_c / h_v$   
212 is negligible when the spontaneous curvature is not large enough to close the crypt (as in  
213 budded shape). In other words, the thickness ratio of a swelling organoid with a partially  
214 opened crypt (e.g., a bulged organoid) is almost independent on  $\gamma_c$ , although increasing crypt  
215 apical tension can influence thickness ratio by increasing  $\alpha$ .



216 **1.3. Line tension in neck zone**

217 So far, we have only considered changes in the bulk properties of each organoid region,  
 218 such as in-plane contractions and spontaneous curvatures. However, mechanical forces at the  
 219 boundary between these two regions may also drive the morphological evolution in biological  
 220 systems (9-11). Here, we assume cells in the neck zone (connection part of crypt and villus)  
 221 carry distinct surface tensions (and hence the free energy) with cells in two regions. Since the  
 222 neck zone of organoid is rather narrow, and more like a hollow cylinder rather than a spherical  
 223 shell, it is reasonable to model the neck zone as a short cylindrical monolayer, and neglect its  
 224 volume contribution to organoid.

225 Considering neck cells with longitudinal side length  $e$ , height  $h$ , and radial side lengths  
 226 in the apical and basal surfaces  $d_a$  and  $d_b$  (see Extended Data Fig. 2C for schematic), then the  
 227 free energy (1) becomes  $f = \Gamma_a e d_a + \Gamma_b e d_b + \Gamma_l e h + \frac{1}{2} \Gamma_l h (d_a + d_b)$ . The geometric  
 228 relationship of a single cell and a cylindrical epithelium can be described by  $d_a = 2\pi R_a / N_r$ ,  
 229  $d_b = 2\pi R_b / N_r$ , where  $N_r$  is the cell number in the radial direction. Letting  $R$  be the neutral  
 230 radius of the cylindrical epithelium, we obtain  $h = N_r V_{e0} / (2\pi e R)$ , which recasts the free  
 231 energy as

$$232 \quad f = \frac{2\pi}{N_r} (\Gamma_a + \Gamma_b) e R + \left[ \frac{1}{2} (\Gamma_b - \Gamma_a) + \Gamma_l \frac{N_r}{2\pi} \right] \frac{V_{e0}}{R} + \Gamma_l \frac{V_{e0}}{e}. \quad (13)$$

233 Eq. (13) indicates that the free energy depends on two geometric variables  $R$  and  $e$ , i.e.  
 234  $f = f(R, e)$ . Considering the free state of cells, which satisfies  $\partial f / \partial R = 0$ ,  $\partial f / \partial e = 0$ , we  
 235 can get radius  $\tilde{R}$  and length  $\tilde{e}$  in the free state

$$236 \quad \tilde{R} = \frac{N_r}{2\pi} \left( \frac{V_{e0} \Gamma_l}{\Gamma_a + \Gamma_b} \right)^{\frac{1}{3}} \left( 1 + \frac{\Gamma_b - \Gamma_a}{2\Gamma_l} \frac{2\pi}{N_r} \right)^{\frac{2}{3}}, \quad \tilde{e} = \left( \frac{V_{e0} \Gamma_l}{\Gamma_a + \Gamma_b} \right)^{\frac{1}{3}} \left( 1 + \frac{\Gamma_b - \Gamma_a}{2\Gamma_l} \frac{2\pi}{N_r} \right)^{-\frac{1}{3}}. \quad (14)$$

237 Using Eq. (14), the free energy of a cell in the neck can finally be expressed as

$$238 \quad f = \frac{2\pi}{N_r} (\Gamma_a + \Gamma_b) \left[ e R + \tilde{e} \tilde{R} \left( \frac{\tilde{R}}{R} + \frac{\tilde{e}}{e} \right) \right]. \quad (15)$$

239 For an organoid with two regions (crypt and villus) and a neck zone, the total free energy  
 240 are contributed by three parts, i.e.  $F = N_c f_c + N_v f_v + N_n f_n$ , where  $N_n$  and  $f_n$  are respectively  
 241 the cell number and cellular free energy in the neck zone ( $f_n$  follows the expression in Eq.  
 242 (15)).

243 Since the neck zone is mainly constrained by other regions in its radial direction, we  
 244 assume a stress-free state in the longitudinal direction, i.e.,  $\partial f / \partial e = 0$ , which leads to  
 245  $e = \tilde{e} \sqrt{\tilde{R}_n / R_n}$ . Then the free energy of neck zone yields

$$246 \quad F_n = N_n f_n = 2\pi N_e (\Gamma_a + \Gamma_b)_n \tilde{e} \sqrt{\tilde{R}_n R_n} \left[ 2 + \left( \frac{\tilde{R}_n}{R_n} \right)^{3/2} \right], \quad (16)$$

247 where  $N_e$  is the cell number in the longitudinal direction (therefore we have  $N_n = N_r N_e$ ).

248 The in-plane contraction ratio  $\Lambda = (\Gamma_a + \Gamma_b)_n / (\Gamma_a + \Gamma_b)_0$  is introduced to characterize  
 249 the ‘line tension’ between two regions. The geometric relationship  $R_n = R_c \sin \theta_c$  implies  
 250  $R_n = R_t g_n^{-1/3}$ , with  $g_n = g_c / \sin^3 \theta_c$ . Then, we have

$$251 \quad \hat{F}_n = F_n / \left[ \pi (\Gamma_a + \Gamma_b)_0 \tilde{R}_0^2 \right] = 2N_e \Lambda \tilde{e} \tilde{R}_n^{1/2} R_0^{-3/2} \left[ 2g_n^{-1/6} \beta^{1/2} + g_n^{1/3} \beta^{-1} \left( \tilde{R}_n / \tilde{R}_0 \right)^{3/2} \right].$$

252 To further simplify  $\hat{F}_n$ , we need to determine  $N_r$ , which affects both  $\tilde{e}$  and  $\tilde{R}_n$ . The radial cell number  
 253 of the neck depends on the total cell number of organoid  $N_t$  and the position of neck  
 254 (dominated by crypt size  $\varphi$ ), that is  $N_r = N_r(\varphi, N_t)$ . Specific expression of  $N_r$  can be  
 255 estimated as follows: A narrow neck in a spherical organoid in free state satisfies  
 256  $N_r \tilde{d} = 2\pi \tilde{R}_0 \sin \theta_n$ , where  $\theta_n$  is the polar angle of neck,  $\tilde{d} = \sqrt{4\pi / N_t} \tilde{R}_0$  is the side length of a  
 257 single cell. Further considering the geometric relation  
 258  $\varphi = 2\pi \tilde{R}_0^2 (1 - \cos \theta_n) / (4\pi \tilde{R}_0^2) = (1 - \cos \theta_n) / 2$ , we can get  $N_r = \sqrt{4\pi N_t} \cdot \Delta$ , where  
 259  $\Delta = \sqrt{\varphi - \varphi^2}$ . To focus on the in-plane contraction in the neck, the difference of apical and  
 260 basal tensions (i.e., spontaneous curvature) is neglected, which finally leads to a simplified free  
 261 energy of the neck

$$262 \quad \hat{F}_n = 8N_e \sqrt{\frac{2\pi}{N_t}} \left( \Lambda^{1/2} \Delta^{1/2} \beta^{1/2} g_n^{-1/6} + \sqrt{2} \Delta^2 \beta^{-1} g_n^{1/3} \right). \quad (17)$$

263 By adding free energy (17) into Eq. (12), we can evaluate the influence of the overall line  
 264 tension, arising from the in-plane contraction of cells in the neck, on organoid morphogenesis.  
 265 Fig. 2B and Extended Data Fig. 3A’’ shows that, although a contractile neck can promote the  
 266 bulging and budding of organoids (i.e., decreased radius ratio  $R_c / R_v$ ), it has negligible effects  
 267 on the thickness ratio  $h_c / h_v$ . This is in contrast with our experimental findings (Fig. 2C),  
 268 where bulging of organoids is robustly accompanied by thickness increases on the crypts

269 compared to villi. This implies that the line tension in neck is not the major driving force for  
 270 crypt bulging. However, it would be interesting in the future to study its potential effect on  
 271 longer-term crypt shape maintenance, which would require an extension of the model to  
 272 consider more complex non-spherical crypt shapes.

#### 273 **1.4. Cell volumes and villus mechanics**

274 The model in Subsection 1.2 considers the influence of crypt mechanics and lumen  
 275 volume on morphogenesis. However, mechanical contributions from the villus could also  
 276 impact intestinal organoid development. For example, in the late stage of organoid  
 277 morphogenesis, the villus shows both cell swelling (Fig. 7B and Extended Data Fig. 8B) and  
 278 increased intensity of basal myosin (Fig. 3A), which might result in elevated basal tensions  
 279 (Fig. 2E). To explore this, we extended the previous model, which assumes a constant cell  
 280 volume in both regions and constant cell tensions in villus during morphogenesis, to  
 281 incorporate potential variations in cell volumes and villus tensions. We thus introduce  
 282 normalized cell volumes  $v_{ec} = V_{ec} / V_{e0}$ ,  $v_{ev} = V_{ev} / V_{e0}$ , where  $V_{ec}$  and  $V_{ev}$  are respectively the  
 283 volumes of a crypt cell and a villus cell. In analogy to the definitions in crypt mechanics, in-  
 284 plane contraction ratio  $\alpha_v = (\Gamma_a + \Gamma_b)_v / (\Gamma_a + \Gamma_b)_0$ , and spontaneous curvature  
 285  $\gamma_v = \frac{1}{2} \left( \frac{\Gamma_b - \Gamma_a}{\Gamma_l} \right)_v \sqrt{\frac{4\pi}{N_t}}$  are introduced to examine the effects of villus tensions. With these  
 286 extensions of the model, this rescaled organoid energy  $\hat{F}$  now reads:

$$287 \quad \hat{F} = v^{2/3} (\alpha_c G_c^{-2/3} + \alpha_v G_v^{-2/3}) + 16v^{-1/3} \left[ \varphi^{3/2} v_{ec} G_c^{1/3} + (1-\varphi)^{3/2} v_{ev} G_v^{1/3} \right] \\
 + 8v^{-1/3} \left[ \varphi v_{ec} g_c^{1/3} \gamma_c + (1-\varphi) v_{ev} g_v^{1/3} \gamma_v \right]. \quad (18)$$

##### 288 **1.4.1. Influence of cell swelling on morphogenesis**

289 We first evaluate the dependence of organoid morphologies on cell swelling in either crypt  
 290 or villus. As shown in Extended Data Fig. 2I, both the swelling of crypt cells and villus cells  
 291 can promote budding. Furthermore, crypt size  $\varphi$  impacts the efficiency of cell swelling on  
 292 budding. Given the fact that the villus is usually much larger than the crypt, swelling of villus  
 293 cells is more efficient to promote budding. Furthermore, even when both regions have an equal  
 294 size, the cell swelling in villus is still more efficient. For a crypt undergoing both cell swelling  
 295 and tension-modulated deformations, the in-plane contraction will limit the extension of crypt  
 296 region, while the crypt bending will be hindered by cell swelling. Overall, cell swelling is less  
 297 efficient on budding when it happens in the tension-enhanced region (i.e., the crypt) than in the

298 normal region (i.e., the villus). Moreover, Extended Data Fig. 2J shows that the effect of cell  
299 swelling on budding can be reversed by lumen expansion (for low crypt apical tension). This  
300 is different from the influence of strong mechanical differences in crypts such as high apical  
301 actomyosin tension, which leads to maintained closure of the crypt even under infinite lumen  
302 expansion.

#### 303 **1.4.2. Influence of villus mechanics on morphogenesis**

304 We then examine the influence of spontaneous curvature of villus  $\gamma_v$  on organoid  
305 morphology. Unlike spontaneous curvature  $\gamma_c$ , which is negative due to the enhanced apical  
306 tension in crypt, spontaneous curvature  $\gamma_v$  is chosen to be positive in Extended Data Fig. 2K-  
307 L, in light of the elevated basal tension and myosin accumulation observed in villus (Fig. 2E  
308 and Fig. 3A) as well as basal constriction observed in wild-type cells next to cells with reduced  
309 Myosin levels (Extended Data Fig. 4G-G''). Interestingly, the spontaneous curvature  $\gamma_v$  will  
310 promote the opening of two regions only when  $\gamma_c$  is quite small ( $|\gamma_c| < 0.05$  or estimated value  
311 in initial bulging phase), while the out-of-plane bending of villus will facilitate the closure of  
312 two regions when the crypt engenders notable spontaneous curvature and strong in-plane  
313 contraction (Extended Data Fig. 2K). Importantly, the dependence of thickness (or radius) ratio  
314 on  $\gamma_v$  is negligible for an organoid with either equal or stronger in-plane contraction in crypt  
315 than in villus (Extended Data Fig. 2L), which we show from Fig. 5 is the relevant case for us.  
316 This argues that although basal enrichment of Myosin in the villus region is expected to help  
317 and contribute to bulging and budding, it cannot be the dominant/sole driving force (otherwise  
318 in-plane contraction of villi would be larger than crypts and lumen inflation would cause crypt  
319 dilation), so that we neglect  $\gamma_v$  in first approximation for the fits discussed in Section 4.

#### 320 **1.5. Preferential proliferation of crypt cells**

321 Besides the three mechanical mechanisms hypothesized in Fig. 2B, and additional  
322 discussions of cell volumes and villus mechanics in Section 1.4, another possible mechanism  
323 of crypt budding is the over-proliferation of crypt cells, which in principle, can also extend the  
324 crypt epithelium (like the effect of decreasing in-plane contraction or cell swelling) and thus  
325 promote organoid morphogenesis. Indeed, differential cell proliferation is observed in  
326 experiments, with cell division occurring predominantly occurs in the crypt region. Although  
327 our model is quasi-static (i.e. it predicts an equilibrium shape at time  $t$  only based on the value  
328 of mechanical parameters at that timepoint, independent of their dynamics, which is reasonable

329 here as morphogenetic timescales of hours/days are very long compared to the timescales of  
 330 shape relaxation for cells under actomyosin tension – typically minutes), we incorporate this  
 331 preferential cell division via its effect on the crypt size. For instance, if the cell number in the  
 332 crypt increases from  $N_c$  to  $N_{cg}$ , while the cell number in the villus is still  $N_v$ , to keep  
 333 everything consistent with the previous definition, we still keep the relative region size as non-  
 334 dimensionalized by the original total cell number  $N_t = N_c + N_v$ , so that the current crypt size  
 335 is  $\varphi_g = N_{cg}/N_t (> \varphi)$ , while the villus size is still  $1 - \varphi$ . The free energy (18) of the system  
 336 then becomes

$$337 \quad \hat{F} = v^{2/3} (\alpha_c G_c^{-2/3} + \alpha_v G_v^{-2/3}) + 16v^{-1/3} \left[ \varphi_g^{3/2} v_{ec} G_c^{1/3} + (1 - \varphi)^{3/2} v_{ev} G_v^{1/3} \right] \\
 338 \quad + 8v^{-1/3} \left[ \varphi_g v_{ec} g_c^{1/3} \gamma_c + (1 - \varphi) v_{ev} g_v^{1/3} \gamma_v \right]. \quad (19)$$

338 Importantly, in Eq. (19), the crypt size  $\varphi_g$  always multiplies the cell volume in crypt  $v_{ec}$ , which  
 339 indicates that the crypt size (or cell number) may modulate the free energy (and thus the  
 340 morphology of an organoid) in a similar way as the cell volume. Hence, according to the  
 341 analysis in Subsection 1.4.1, one can also expect that crypt growth also promotes budding,  
 342 although its effect will be eliminated by volume expansion. Further theoretical discussion on  
 343 the influence of crypt growth, combined with specific crypt mechanics, is given in Subsection  
 344 3.3.1. In experiments, blocking mitotic cell division shows negligible effects on organoid  
 345 morphologies (Extended Data Fig. 4F), implying preferential proliferation of crypt cells is not  
 346 a major promotor of the morphogenesis of intestinal organoids. Thus, to summarize, we take  
 347 into account differential proliferation of cells in crypt indirectly (as it sets the value of crypt  
 348 size  $\varphi$ , which we independently measure prior to fitting the data to the model), but can assume  
 349 that it does not in itself maintain budded shapes (for instance by creating residual stresses in  
 350 crypts).

## 351 **1.6. Summary of two-region vertex model**

352 In the subsections above, we have thus proposed a three-dimensional two-region vertex  
 353 model to describe the morphogenesis of intestinal organoids. The model shows that, altered  
 354 cell tension, with emphasis on crypt apical constriction, can modulate in-plane contraction and  
 355 induce out-of-plane bending of the epithelium. As a closed epithelium filled with lumen fluid,  
 356 the overall volume of an organoid can also modulate its morphology. Other potential  
 357 mechanisms, including active contraction at the neck zone, cell swelling, altered contractility  
 358 of villus cells, preferential proliferation of crypt cells, are also evaluated by extending the

359 model. By combining experimental observations with theoretical results, we find cell swelling  
 360 also plays an important role in the morphogenesis of intestinal organoids.

## 361 2. Analytic approximations

362 Experimentally, crypt regions are much smaller than villus regions, in particular during  
 363 the first phases of bulging/budding which we explore here. Based on this, we can simplify the  
 364 model by considering  $V_c \ll V_v$  and  $\theta_v \rightarrow 0$ . The volumetric relation  $V = V_c + V_v$  can be  
 365 expressed as  $R_t^3 \approx p_c R_c^3 + R_v^3$ , where  $p_c = (2 + 3 \cos \theta_c - \cos^3 \theta_c) / 4$ . Considering  $V_c \ll V_v$  (or  
 366  $p_c R_c^3 \ll R_v^3$ ) leads to  $R_v \approx R_t \left[ 1 - (p_c / 3)(R_c / R_t)^3 \right]$ . Combined with Eq. (10), free energy (7)  
 367 can be rewritten as

368

$$369 \quad F \approx \pi (\Gamma_a + \Gamma_b)_c s_c R_c^2 \left[ 1 + 2 \left( \frac{\tilde{R}_c}{R_c} \right)^3 \right] + \pi (\Gamma_a + \Gamma_b)_v s_v R_t^2 \left\{ 1 + 2 \left( \frac{\tilde{R}_v}{R_t} \right)^3 + \frac{2}{3} \left[ \left( \frac{\tilde{R}_v}{R_t} \right)^3 - 1 \right] p_c \left( \frac{R_c}{R_t} \right)^3 \right\}$$

370 . (20)

371 Letting  $\beta_c = R_c / \tilde{R}_0$  be the normalized crypt radius, one obtains

$$372 \quad \hat{F} \approx \alpha s_c \beta_c^2 + (16\varphi^{3/2} s_c^{-1/2} + 8\varphi\gamma_c) \beta_c^{-1} + s_v \beta^2 + 16(1-\varphi)^{3/2} s_v^{-1/2} \beta^{-1}$$

$$+ \frac{2}{3} \left[ 8(1-\varphi)^{3/2} s_v^{-1/2} \beta^{-3} - s_v \right] p_c \beta_c^3 \beta^{-1}, \quad (21)$$

373 For a small  $\theta_v$ , using  $R_c \sin \theta_c = R_v \sin \theta_v$ , we have  $\theta_v \approx (R_c / R_v) \sin \theta_c$ , which leads to  
 374  $s_v \approx 4 - (\beta_c / \beta)^2 \sin^2 \theta_c$ . With these approximations, the free energy  $\hat{F}$  only depends on  $\theta_c$   
 375 and  $\beta_c$ :

$$376 \quad \hat{F} \approx 4\beta^2 + 8(1-\varphi)^{3/2} \beta^{-1} + \alpha s_c \beta_c^2 + (16\varphi^{3/2} s_c^{-1/2} + 8\varphi\gamma_c) \beta_c^{-1}$$

$$+ \left[ (1-\varphi)^{3/2} \beta^{-3} - 1 \right] \left( \beta_c^2 \sin^2 \theta_c + \frac{8}{3} p_c \beta_c^3 \beta^{-1} \right). \quad (22)$$

377 In the following, based on this simplified free energy (22), we will analyze specific  
 378 organoid morphologies and get corresponding analytical expressions of morphometric  
 379 parameters. As a limiting case, crypt morphologies under infinite organoid expansion will be  
 380 discussed. Besides, the influence of cell volumes will be explicitly explored with analytic  
 381 formulation.

382

## 383 2.1. Scaling laws for thickness and radius modulations

384 As aforementioned, after the initial symmetric breaking event, an intestinal organoid will  
 385 evolve towards non-spherical configurations. The organoid first undergoes a bulging phase  
 386 with the crypt gradually bulges out, then enters into a budded phase. Here, we focus on these  
 387 two typical morphologies, the bulged shape and the budded one, during the development of  
 388 intestinal organoids, and make use of their shape features to further simplify the free energy  
 389 shown in Eq. (22) and get analytical expressions of the radius ratio  $R_c / R_v$  and the thickness  
 390 ratio  $h_c / h_v$ .

### 391 2.1.1. Bulged organoid

392 In the bulging stage, the crypt just begins to form and is rather small (i.e.,  $\varphi$  is small).  
 393 These indicate  $\theta_* = \pi - \theta_c \sim \varphi^{1/2}$  can be served as a small parameter (i.e.,  $\theta_* \rightarrow 0$ ), and  
 394 functions of  $\theta_c$  in Eq. (22) can be approximated as  $s_c \approx \theta_*^2$ ,  $\sin^2 \theta_c \approx \theta_*^2$ , and  $p_c \approx 0$ . Then, the  
 395 free energy (22) is simplified as

$$396 \quad \hat{F} \approx 4\beta^2 + 8\beta^{-1} + (\alpha - 1 + \beta^{-3})\bar{\theta}_*^2 + 16\varphi^{3/2}\bar{\theta}_*^{-1} + 8\varphi\gamma_c\beta_c^{-1}, \quad (23)$$

397 where  $\bar{\theta}_* = \beta_c\theta_*$ , and the radius ratio and thickness ratio are respectively approximated as

$$398 \quad R_c / R_v \approx \beta_c / \beta \quad \text{and} \quad h_c / h_v \approx 4\varphi\beta^2\bar{\theta}_*^{-2}. \quad \text{One obtains } \bar{\theta}_* = 2\varphi^{1/2}(\alpha - 1 + \beta^{-3})^{-1/3} \text{ from}$$

399  $\partial\hat{F} / \partial\bar{\theta}_* = 0$ . To get an estimate of the normalized crypt radius  $\beta_c$ , we need to expand the

400 functions of  $\theta_c$  ( or  $\theta_*$  ) in Eq. (22) to a higher order  $O(\theta_*^4)$ , i.e.  $s_c \approx \theta_*^2 - \theta_*^4 / 12$ ,

401  $\sin^2 \theta_c \approx \theta_*^2 - \theta_*^4 / 3$ , and  $p_c \approx 3\theta_*^4 / 16$ , which yield an additional sequence of terms in free

402 energy (23) as  $(2/3)\varphi^{3/2}\beta_c^{-2}\bar{\theta}_* + \bar{\theta}_*^4 \left\{ -\alpha\beta_c^{-2} / 12 + (\beta^{-3} - 1)(-\beta_c^{-2} / 3 + \beta_c^{-1}\beta^{-1} / 2) \right\}$ . Using the

403 extended free energy and considering  $\partial\hat{F} / \partial\beta_c = 0$  yield  $\beta_c^{-1} = \beta^{-1} - 16\varphi\gamma_c\bar{\theta}_*^{-4} / (1 - \beta^{-3})$ . Thus,

404 the radius ratio and thickness ratio of a bulged organoid can be finally estimated as

$$405 \quad \frac{R_v}{R_c} \approx 1 - \varphi^{-1}\gamma_c \frac{[(\alpha - 1)v + 1]^{4/3}}{v - 1}, \quad \frac{h_c}{h_v} \approx [(\alpha - 1)v + 1]^{2/3}. \quad (24)$$

406 Eq. (24) thus predicts that the thickness ratio depends only, at first order, on the in-plane

407 contraction ratio  $\alpha$ . We found excellent agreement between numerical solutions of the full

408 model, and the analytical criteria of Eq. (24), and confirmed in particular that the thickness

409 ratio depends crucially on  $\alpha$ , while it is almost independent on  $\gamma_c$  (Extended Data Fig. 3E).

410 Furthermore, the radius ratio of a bulged organoid is expected to depend on  $\varphi^{-1}\gamma_c$  and  $\alpha$  from  
 411 Eq. (24). In a bulging crypt, the apical actomyosin accumulation is initially small (Fig. 2C), so  
 412 that it is expected to engender weak in-plane contraction and out-of-plane bending, and  
 413 corresponding mechanical parameters  $\alpha - 1$  and  $\gamma_c$  can both be considered small. However, Eq.  
 414 (24) indicates that the radius ratio is less dependent on  $\alpha - 1$  than  $\gamma_c$ , and the only leading  
 415 parameter of  $R_c / R_v$  is  $\varphi^{-1}\gamma_c$ . As verified in Extended Data Fig. 3E, the crypt size  $\varphi$  and  
 416 spontaneous curvature  $\gamma_c$  are indeed combined to affect the crypt radius, and the resulting  
 417 parameter  $\varphi^{-1}\gamma_c$  can modulate  $R_c / R_v$ . Besides, Eq. (24) can fit well with the numerical  
 418 results of a bulged organoid with varying volumes (Extended Data Fig. 3E).

### 419 2.1.2. Budded organoid

420 For a budded organoid (which is equivalent to a near-closed organoid in our simplified  
 421 spherical region models), we can take the converse limit of small  $\theta_c$  (i.e.  $\theta_c \rightarrow 0$ ), which  
 422 results in  $s_c \approx 4$ ,  $\sin^2 \theta_c \approx 0$ , and  $p_c \approx 1$ . Then the full expression of free energy (22) reduces  
 423 to

$$424 \hat{F} \approx 4\beta^2 + 8(1-\varphi)^{3/2} \beta^{-1} + 4\alpha\beta_c^2 + (8\varphi^{3/2} + 8\varphi\gamma_c)\beta_c^{-1} + \frac{8}{3}[(1-\varphi)^{3/2} \beta^{-3} - 1]\beta_c^3\beta^{-1}, \quad (25)$$

425 which only depends on the normalized crypt radius  $\beta_c$ . Minimizing this energy with respect  
 426 to crypt radius (i.e.  $\partial\hat{F}/\partial\beta_c = 0$ ) leads to  $\beta_c\beta^{-1} = \left[ \alpha - (\varphi^{3/2} + \varphi\gamma_c)\beta_c^{-3} \right] / \left[ 1 - (1-\varphi)^{3/2} \beta^{-3} \right]$ ,  
 427 which can be recast as

$$428 1 - \left( \frac{R_c}{\tilde{R}_c} \right)^{-3} = \alpha^{-1} \frac{R_c}{R_t} \left[ 1 - (1-\varphi)^{3/2} v^{-1} \right]. \quad (26)$$

429 Experiments indicate that a budding organoid undergoes sustaining apical actomyosin  
 430 accumulation in the crypt, which will lead to an enhanced in-plane contraction, i.e.  $\alpha > 1$ .  
 431 Besides, considering the crypt volume is usually much smaller than the overall volume of the  
 432 organoid, i.e.  $V_c \ll V$ , where  $V_c = 4\pi R_c^3 / 3$  and  $V = 4\pi R_t^3 / 3$  for a budded organoid, we can  
 433 find that  $R_c / R_t < 1$  always holds. Thus, the value of the right side of Eq. (26) is usually close  
 434 to 0, which indicates that  $R_c / \tilde{R}_c \approx 1$  (i.e.  $R_c \approx \tilde{R}_c$ ). Further considering  $R_v \approx R_t$ , then the  
 435 radius/thickness ratio of a budded organoid can be approximated as



436 
$$\frac{R_c}{R_v} \approx w_c v^{-1/3}, \quad \frac{h_c}{h_v} \approx \varphi(1-\varphi)^{-1} w_c^{-2} v^{2/3}, \quad (27)$$

437 where  $w_c = \tilde{R}_c / \tilde{R}_0 = \varphi^{1/2} \alpha^{-1/3} (1 + \varphi^{-1/2} \gamma_c)^{1/3}$ . Eq. (27) indicates that the thickness (or radius)  
 438 ratio of a budded organoid depends only on the crypt size  $\varphi$  and  $u = \alpha(1 + \varphi^{-1/2} \gamma_c)^{-1}$ , a  
 439 parameter coupling the in-plane contraction and spontaneous curvature of crypt. As verified in  
 440 Extended Data Fig. 3F, the mechanical modulation of the thickness (or radius) ratio can be  
 441 depicted by a single parameter  $u$ . Besides, Eq. (27) indicates a simple scaling law between  
 442 organoid morphometrics and lumen volume for budded organoids:  $R_c/R_v \sim v^{-1/3}, h_c/h_v \sim$   
 443  $v^{2/3}$ , which again shows excellent agreement with numerical solutions to the full model  
 444 (Extended Data Fig. 3F).

445 Strikingly, this predicts a key difference between the inflation of bulged vs budded  
 446 organoids. In the former, the radius ratio is an increasing function of lumen volume (leading to  
 447 near-spherical shapes upon inflation), while in the latter, the radius ratio always decreases with  
 448 lumen volume (as the crypt never opens up, and the bulk of the deformation is born by the  
 449 villus region). As discussed in the main text, we challenged this prediction via two different  
 450 types of inflation experiments, and found good qualitative and quantitative agreement (Fig.  
 451 5B-C, Extended Data Fig. 7A-B), see also Section 4 for details on the fitting strategy used.

452 Although the above derivations are based on Eq. (22), which can only describe organoids  
 453 with small crypts, Eq. (27) actually holds for budded organoids with varied crypt sizes. In the  
 454 following, we will directly use Eq. (7), a generic formulation of free energy, to derive Eq. (27).  
 455 For a budded organoid, both  $\theta_c$  and  $\theta_v$  are close to 0, which lead to  $N_c / N'_c \approx 1, N_v / N'_v \approx 1$ .  
 456 Then, Eq. (7) reduces to

457 
$$F \approx 4\pi(\Gamma_a + \Gamma_b)_c R_c^2 \left[ 1 + 2\left(\tilde{R}_c / R_c\right)^3 \right] + 4\pi(\Gamma_a + \Gamma_b)_v R_v^2 \left[ 1 + 2\left(\tilde{R}_v / R_v\right)^3 \right], \quad (28)$$

458 which is a function of two radii  $R_c$  and  $R_v$ . These two radii should also satisfy the volumetric  
 459 constraint, which is simplified as  $R_t^3 = R_c^3 + R_v^3$  in the budded case. Hence, the radii can be  
 460 determined by constructing an auxiliary function that contains both free energy (28) and the  
 461 volumetric constraint. For the normalized radii  $\bar{R}_c = R_c / \tilde{R}_c$  and  $\bar{R}_v = R_v / \tilde{R}_v$ , the auxiliary  
 462 function can be written as  $y = F / [\pi(\Gamma_a + \Gamma_b)_0 \tilde{R}_0^2] + L[w^3 \bar{R}_c^3 + \bar{R}_v^3 - R_t^3 / \tilde{R}_v^3]$ , where  $L$  is a  
 463 Lagrange multiplier,  $w = \tilde{R}_c / \tilde{R}_v$ . That is

464 
$$y = \alpha w^2 \bar{R}_c^2 (1 + 2\bar{R}_c^{-3}) + \bar{R}_v^2 (1 + 2\bar{R}_v^{-3}) + L[w^3 \bar{R}_c^3 + \bar{R}_v^3 - \bar{R}_t^3 / \bar{R}_v^3]. \quad (29)$$

465 Calculating  $\partial y / \partial \bar{R}_c = 0$  and  $\partial y / \partial \bar{R}_v = 0$  lead to  $1 - \bar{R}_c^{-3} = w\alpha^{-1} (\bar{R}_c / \bar{R}_v) (1 - \bar{R}_v^{-3})$ , which will  
 466 further result in Eq. (27) by using  $\bar{R}_c \approx 1$  and  $\bar{R}_v \approx v^{1/3} \tilde{R}_0 / \tilde{R}_v$ .

## 467 2.2. Infinite volume expansion

468 As discussed above and in the main text, a key experimental finding is that budded  
 469 organoids tend to stay closed upon volume expansion, while bulged organoids do not. To  
 470 further explore the difference between the two morphologies, we examine the limit of infinite  
 471 organoid inflation (i.e.,  $\beta \rightarrow \infty$ ), for which the boundary between these two morphologies in  
 472 phase-space can be derived analytically.

473 We compare the free energies of organoids in partially open vs fully closed crypts. Since  
 474 the partially open and fully closed crypt morphologies respectively belong to bulged and  
 475 budded organoids discussed above, we can approximate their free energies by following the  
 476 analysis in Subsection 2.1, and considering  $\beta \rightarrow \infty$ . Then, we have  $\hat{F}_{po} \approx 4\beta^2 + 12\varphi(\alpha - 1)^{1/3}$   
 477 for a partially open case, and  $\hat{F}_{fc} \approx 4\beta^2 + 12\varphi(1 + \varphi^{-1/2}\gamma_c)^{2/3} \alpha^{1/3}$  for a fully closed shape. The  
 478 crypt in a budded organoid will stay closed when  $\hat{F}_{fc} < \hat{F}_{po}$ , which holds for  
 479  $(1 + \varphi^{-1/2}\gamma_c)^2 < 1 - \alpha^{-1}$ , which specifies a critical value of crypt apical tension distinguishing  
 480 the two configurations.

481 A phase diagram of crypt morphologies under infinite lumen expansion are shown in  
 482 Extended Data Fig. 3G. The effects of in-plane contraction  $\alpha$  and spontaneous curvature  $\gamma_c$   
 483 are examined in a representative parameter-regime: an initially large lumen (or thin monolayer)  
 484 ( $\tilde{\kappa}_0 = 10$ ) and a large crypt region ( $\varphi = 0.2$ ). From the phase diagram, there also exists the  
 485 third crypt shape: fully closed with vanishing apical surface (i.e.  $R_{ac} = 0$ ). For a fully closed  
 486 crypt in a budded organoid to get  $R_{ac} = 0$ , it needs to satisfy  $\varphi^{1/2} + \gamma_c = (2\tilde{\kappa}_0)^{-1} \alpha$ .

## 487 2.3. Dependence on cell volumes

488 In aforementioned derivations, cell volumes were set to be constant and identical in crypt  
 489 and villus regions, i.e.,  $v_{ec} = 1$  and  $v_{ev} = 1$ . However, this is typically not the case, as discussed  
 490 in the main text: Intestinal organoids display increases in cell volume as the lumen volume  
 491 decreases during morphogenesis (Fig. 7D). To consider effects of cell volumes on specific  
 492 development stages listed in Subsection 2.1, we incorporate the possibility for varying and  
 493 different cell volumes to the simplified free energy (22), which is then modified as:

$$\begin{aligned}
\hat{F} \approx & 4\beta^2 + 8(1-\varphi)^{3/2} v_{ev}\beta^{-1} + \alpha s_c \beta_c^2 + (16\varphi^{3/2} s_c^{-1/2} + 8\varphi\gamma_c) v_{ec}\beta_c^{-1} \\
& + \left[ (1-\varphi)^{3/2} v_{ev}\beta^{-3} - 1 \right] \left( \beta_c^2 \sin^2 \theta_c + \frac{8}{3} p_c \beta_c^3 \beta^{-1} \right)
\end{aligned} \tag{30}$$

and follow the similar analysis in Subsections 2.1. In particular, we show that the generalized analytic expressions for the radius (or thickness) ratios, including Eqs. (24) and (27), become:

$$\begin{aligned}
\text{Bulged :} \quad & \frac{R_v}{R_c} \approx 1 - \varphi^{-1} \gamma_c v_{ec}^{-1/3} \frac{[(\alpha-1)v + v_{ev}]^{4/3}}{v - v_{ev}}, \quad \frac{h_c}{h_v} \approx v_{ec}^{1/3} v_{ev}^{-1} [(\alpha-1)v + v_{ev}]^{2/3} \\
\text{Budded :} \quad & \frac{R_c}{R_v} \approx \varphi^{1/2} v_{ec}^{1/3} u^{-1/3} v^{-1/3}, \quad \frac{h_c}{h_v} \approx (1-\varphi)^{-1} v_{ec}^{1/3} v_{ev}^{-1} u^{2/3} v^{2/3}
\end{aligned} \tag{31}$$

In view of the fact that cell swelling typically happens during the later development phases (Fig. 1, 2 and Extended Data Fig. 8B), which correspond to the budding stage, we will discuss the dependence of cell volumes  $v_{ec}$  and  $v_{ev}$  on thickness (or radius) ratio only for budded organoids. For a budded organoid, scaling laws  $R_c/R_v \sim v_{ec}^{1/3}$  and  $h_c/h_v \sim v_{ec}^{1/3} v_{ev}^{-1}$  are suggested by Eq. (31) and verified by numerical results in Extended Data Fig. 3H. It can be seen from the scaling laws that, cell swelling in crypt always results in an increased radius (or thickness) ratio, while cell swelling in villus decreases the thickness ratio.

#### 2.4. Summary of analytic results

These analytic results provide insights into the physical mechanisms of crypt morphogenesis. As aforementioned, modulated by cell tensions, an epithelial sheet can engender two types of active deformations: in-plane contraction and spontaneous bending, which are respectively described by in-plane contraction ratio  $\alpha$  and spontaneous curvature  $\gamma_c$ . However, in-plane contraction and bending can both vary at the same time (for instance if only the apical tension in crypt increases, all other parameters being kept constant) which implies the two mechanical variables  $\alpha$  and  $\gamma_c$  are combined to affect the geometric quantities of organoid epithelium, such as thickness (and radius) ratios. The analytic results in Subsection 2.1 indicates that the initial bulging morphology depends on  $\alpha$  for the thickness ratio,  $\varphi^{-1}\gamma_c$  for the radius ratio, while the budding configuration is only controlled by  $u = \alpha(1 + \varphi^{-1/2}\gamma_c)^{-1}$ .

Here, we restricted ourselves to a two-region morphology (one crypt and one villus), although highly similar results are expected when considering more than one crypt region. Although in principle, budded shapes can arise even in the case of one-region organoids (e.g. absence of mechanical differences between stem and differentiated cells, as explored by

520 Rozman et al. (12), who consider all cells of an organoid have equal properties, and budded  
521 shape can occur for remarkable apico-basal tension difference), we note that this unlikely to  
522 occur in intestinal organoids, as i) we experimentally observed strong region differences in  
523 both actomyosin patterns and apico-basal tensions (assessed both via laser ablation in Fig. 2D  
524 and micropipette aspiration in Fig. 2E), and ii) one-region organoids are predicted to become  
525 spherical when inflated above a critical size, which is not what we observed in our inflation  
526 experiments (Fig. 5B-C, Extended Data Fig. 7A-B).

527 In view of the fact that shape transformation from budded to open seldom happens even  
528 though the lumen volume increases dramatically by  $\sim 5$  times (Fig. 5C'), the diagrams of crypt  
529 morphology with infinite volume (Extended Data Fig. 3G) can be used to determine bounds  
530 for the parameters  $\gamma_c$  and  $\alpha$ . We thus use these analyses and analytical criteria to guide the  
531 fitting of experimental data (both during normal organoid morphogenesis and upon organoid  
532 inflation).

### 533 **3. Morphogenesis with enhanced apical constriction and water uptake**

534 To evaluate the influence of specific parameters on organoid morphologies, parameters in  
535 crypt mechanics (e.g. in-plane contraction  $\alpha$  and spontaneous curvature  $\gamma_c$ ) and volumes (e.g.  
536 organoid volume  $v$  and volume of a villus cell  $v_{ev}$ ) are usually analyzed separately in previous  
537 sections. Here, we focus on specific biophysical mechanisms uncovered by experiments,  
538 showing that these parameters may be coupled together to modulate organoid morphologies.

#### 539 **3.1. Apical tension in crypts modulates both spontaneous curvature and in-plane** 540 **contraction**

541 Firstly, experiments indicate that enhanced apical constriction of crypt is the leading  
542 mechanism in organoid morphogenesis. As assumed in Section 1, the initial spherical organoid  
543 has the same tension  $\Gamma_0$  on both apical and basal surfaces, and the lateral tensions in both  
544 regions are  $\Gamma_l$ . With the morphological evolution of organoids, the accumulation of  
545 actomyosin on crypt apical surface leads to an increase in crypt apical tension, that is  
546  $\Gamma_{ac} = m\Gamma_0$  with  $m$  the normalized crypt apical tension satisfying  $m \geq 1$ , while the other  
547 tensions are assumed to be constant, i.e.  $\Gamma_{bc} = \Gamma_{av} = \Gamma_{bv} = \Gamma_0$ . Considering that the size of the  
548 initial spherical organoid are regulated by two tensions  $\Gamma_0$  and  $\Gamma_l$ , one can easily find the

549 relation between the shape factor  $\tilde{\kappa}_0$  and these two tensions, i.e.  $\tilde{\kappa}_0 = \frac{\Gamma_l}{2\Gamma_0} \sqrt{\frac{N_c}{4\pi}}$ . Then, one can  
 550 rewrite in-plane contraction  $\alpha$  and spontaneous curvature of crypt  $\gamma_c$  as

$$551 \quad \alpha = \frac{1+m}{2}, \gamma_c = \frac{1-m}{4\tilde{\kappa}_0}. \quad (32)$$

552 Eq. (32) shows that crypt apical tension can simultaneously modulate in-plane contraction  $\alpha$   
 553 and spontaneous curvature  $\gamma_c$ , and that shape factor  $\tilde{\kappa}_0$  is also important for the resulting shape.  
 554 In this study, actomyosin accumulation is considered to be the sole mechanism that modulates  
 555 cellular tensions, although other regulatory mechanisms, such as stretch-induced cortex  
 556 dilation (13), are reported to be important for epithelia under deformation.

### 557 **3.2. Lumen/cell volume changes from villus differentiation**

558 Secondly, experiments verify that villus cells up-regulate apical ion pumps that lead to  
 559 the swelling of villus cells and shrinkage of the lumen (Fig. 7). This water uptake of villus cells  
 560 will modulate two parameters in our model: the organoid volume  $v$ , which is the sum of the  
 561 lumen volume and half the epithelial volume in villus, and the volume of villus cell  $v_{ev}$ . For  
 562 simplicity, we assume the organoid volume is only modulated by water uptake. Then, during  
 563 the water uptake of villus cells, the organoid volume is related to volume of a single villus cell  
 564  $v_{ev}$  as

$$565 \quad v = 1 - \frac{3(1-\varphi)}{2\tilde{\kappa}_0} (v_{ev} - 1). \quad (33)$$

566 Obviously, the water uptake from cells will lead to a decrease in organoid volume  $v$ . Before  
 567 specific discussion on the influence of water uptake by villus cells on organoid morphogenesis,  
 568 we reassess the efficiency of water uptake by different cell types, although the influence of cell  
 569 swelling has been evaluated in Subsection 1.4.1.

#### 570 **3.2.1. Efficiency for morphogenesis of different scenarios for volume changes**

571 Consider the relative reduction of lumen volume  $\Delta v_{lu}$  is compensated by i) volume  
 572 increase in all cells, which lead to  $v_{ec} = v_{ev} = \tilde{\kappa}_0 \Delta v_{lu} / 3 + 1$ , ii) volume increase in crypt cells  
 573 only, which yields  $v_{ec} = \tilde{\kappa}_0 \Delta v_{lu} / (3\varphi) + 1$ , and iii) volume increase in villus cells only, which  
 574 results in  $v_{ev} = \tilde{\kappa}_0 \Delta v_{lu} / [3(1-\varphi)] + 1$ . For the water uptake by cells, including all the three cases  
 575 above, the overall volume is  $v \approx 1 - \Delta v_{lu} / 2$ . Besides, we also consider the case that the

576 reduction of luminal fluid is due to the leakage of epithelium, which corresponds to  
577  $v_{ec} = v_{ev} = 1$ , and  $v = 1 - \Delta v_{lu}$ . As shown in Fig. 7F, water uptake by villus cells is the most  
578 efficient mechanism for organoid budding.

### 579 **3.2.2. Relevance for *in vivo* morphogenesis**

580 Given that the geometry of the gut *in vivo* is that of a tube, rather than a closed sphere as  
581 in organoids, we next wish to discuss the relevance of these findings in the absence of lumen  
582 volume changes. From a mechanical perspective, we reason that villus swelling should still  
583 promote crypt budding, even in the absence of significant lumen changes, as this can also  
584 increase the compressive stresses exerted at the crypt/villus boundary. Indeed, simulating villus  
585 cell swelling in the absence of lumen shrinkage still contribute to crypt budding (Fig. 7G).  
586 Interestingly, we find a similar situation *in vivo*, with marked increase in villus cell volume in  
587 the first days of post-natal development (Extended Data Fig. 8C), which is concomitant to crypt  
588 morphogenesis.

### 589 **3.3. Combined effects of tension and volume changes**

590 Finally, we examine the influence of concomitant crypt apical constriction and water  
591 uptake of villus cells on organoid morphology in Extended Data Fig. 6. The water uptake is  
592 evaluated by the normalized volume of a villus cell  $v_{ev}$ , and causes variations in the lumen  
593 volume, as shown in Eq. (33).

#### 594 **3.3.1. Efficiency for morphogenesis**

595 As expected, both the enhanced apical constriction in crypt and water uptake of villus  
596 cells can lead to budding (Extended Data Fig. 6A), and the critical apical tension and degree  
597 of water uptake are affected by the crypt size  $\varphi$  and shape factor  $\tilde{\kappa}_0$  (Extended Data Fig. 6B).  
598 It is hard to close a large crypt by apical constriction alone, since the in-plane contraction of  
599 the epithelium will lead to the elevation of luminal fluid pressure, which further hinders the  
600 bending of the crypt, and a larger contractile region (i.e., the crypt) will lead to a higher fluid  
601 pressure. As shown in Eq. (32), spontaneous curvature is inversely related to the shape factor  
602  $\tilde{\kappa}_0$ , thus strong apical constriction is needed for the budding of an organoid with a thin  
603 epithelium or a big lumen (i.e. large shape factor in Extended Data Fig. 6B). Besides, as  
604 observed in experiments, an organoid usually undergoes enhanced apical constriction in the  
605 bulging stage, which is followed by the water uptake of villus cells. Setting the normalized

606 crypt apical tension to  $m = 2$ , we also examine the degree of water uptake that resulting in the  
607 closure of two regions in Extended Data Fig. 6B.

608 Although the phase diagrams in Extended Data Fig. 6B clearly show that, a large crypt  
609 size is not favorable for apical constriction-driven budding, the results are obtained under the  
610 assumption that region sizes keep constant during development. If the organoid displays  
611 preferential proliferation of crypt cells, then one can expect that enlarging crypt size would  
612 promote budding, since an increase in cell number should have similar influence on  
613 morphogenesis with swelling of crypt cells, as discussed in Subsection 1.5. Indeed, with  
614 enhanced apical tension, crypt growth can promote budding (Extended Data Fig. 6C), although  
615 the cell number in the crypt needs to be doubled. An increase in cell number engenders an  
616 equivalent volume effect of lumen shrinkage, which compresses the crypt/villus boundary and  
617 thus promotes budding. After removing the volume effect by rescaling the organoid volume  $v$   
618 in Extended Data Fig. 6D, we can find that the morphologies are all quite close to those in the  
619 scenario considering constant crypt size (i.e.  $\varphi' = \varphi_g / (1 + \Delta\varphi)$  with  $\Delta\varphi = \varphi_g - \varphi$ ), and the  
620 negative effect of crypt size on organoid morphologies uncovered in Extended Data Fig. 6B is  
621 restored. For a swollen organoid (e.g., the one with  $v = 1.2$  in Extended Data Fig. 6E), the  
622 volume effect is weakened, and an enlarging crypt no longer benefits organoid morphogenesis.

### 623 3.3.2. Influence on morphometric parameters

624 The morphometric parameters, i.e., thickness ratio  $h_c / h_v$  and radius ratio  $R_c / R_v$ , also  
625 evolve with apical constriction and water uptake. An organoid with enhancing crypt apical  
626 constriction may undergo three phases: Bulging, budding, and budding with vanishing crypt  
627 apical surface (i.e.,  $R_{ac} = 0$ ). In the first two phases, enhanced apical constriction in crypt leads  
628 to an increase in the thickness ratio and a decrease in the radius ratio (Extended Data Fig. 6F-  
629 G), and the transformation from the bulged to the budded shape results in negligible variations  
630 in the trends of thickness ratios but notable changes in those of radius ratios. With continued  
631 enhancement of apical constriction, the apical surface of a closed crypt will contract towards a  
632 point, then the crypt will stop thickening and the thickness (or radius) ratio goes into a plateau,  
633 as shown in Extended Data Fig. 6F.

634 Morphometric parameters in these three phases are also affected by shape factor  $\tilde{\kappa}_0$  and  
635 region size  $\varphi$ . As aforementioned, spontaneous curvature  $\gamma_c$  results in an increased thickness  
636 and decreased radius of the crypt. Considering  $\gamma_c$  is inversely proportional to shape factor  $\tilde{\kappa}_0$

637 (Eq. (32)) , one can find that a larger  $\tilde{\kappa}_0$  will leads to a smaller thickness ratio  $h_c / h_v$  and  
638 larger radius ratio  $R_c / R_v$  in the bulging and budding phases, as verified in Extended Data Fig.  
639 6F. While crypt size  $\varphi$  has negligible influence on the thickness (or radius) ratio in these two  
640 phases (Extended Data Fig. 6G). However, both shape factor  $\tilde{\kappa}_0$  and crypt size  $\varphi$  are crucial  
641 on the third phase. Since the apical surface of an organoid with a thin epithelium/large lumen  
642 is hard to contract into a point, a large shape factor will delay the transition towards the third  
643 phase (Extended Data Fig. 6F). And a large crypt in the budding phase will become a closed  
644 sphere with large radius  $R_c$ , which makes it hard to get  $R_{ac} = R_c - h_c / 2 = 0$  and enter into the  
645 third phase (Extended Data Fig. 6G). After enhanced apical constriction in crypt, water uptake  
646 of villus cells will keep promoting the morphogenesis. As expected, water uptake of villus cells  
647 will decrease the thickness ratio and promote the closure of two region (Extended Data Fig.  
648 6H). Morphometric parameters show distinct trends in bulging and budding phases. With the  
649 water uptake, the thickness ratio decreases more sharply in a budded organoid than in a bulged  
650 one, while the radius ratio only shows notable changes in the bulging phase.

651 We further explore the influence of crypt apical constriction on the evolution of thickness  
652 ratio  $h_c / h_v$  and radius ratio  $R_c / R_v$  during organoid expansion. As expected and shown in  
653 Extended Data Fig. 6I, the thickness ratio always increases with volume expansion for an  
654 organoid with enhanced crypt apical constriction, which prevents the crypt from inflating with  
655 organoid expansion. As already found in Extended Data Fig. 2 and analyzed in Subsection 2.1,  
656 for a bulged organoid with weak crypt apical constriction, the radius ratio increases with  
657 volume expansion, while the radius ratio of a budded organoid decreases with volume  
658 expansion (Extended Data Fig. 6I). Besides, the transformation from a budded shape to a  
659 bulged one can also happen, and will also affect the thickness (or radius) ratio. We also discuss  
660 morphologies of crypts with enhanced apical constriction under infinite volume expansion in  
661 Extended Data Fig. 6J. Setting crypt size  $\varphi = 0.2$  (which is the average value that we measured  
662 experimentally, see Section 4 for details), the crypt morphologies are modulated by two  
663 parameters: normalized crypt apical tension  $m$  and shape factor  $\tilde{\kappa}_0$ . The phase diagram  
664 indicates that the three morphologies discussed in Extended Data Fig. 3G (partially open, fully  
665 closed, and fully closed with vanishing apical surface) still exist for crypts with enhanced apical  
666 constriction. Inserting Eq. (32) into the critical condition in Subsection 2.2, one obtains that  
667 the crypt will never open up if the normalized crypt apical tension  $m$  satisfies  
668  $\left[1 + (1 - m) / (4\varphi^{1/2}\tilde{\kappa}_0)\right]^2 + 2 / (1 + m) < 1$  (whose lower bound is named as  $m_{\text{crit}}$  afterwards), no



669 matter the lumen volume. However, when  $m$  is larger than  $2\varphi^{1/2}\tilde{\kappa}_0$ , the apical surface will  
 670 contract into a point, resulting in  $R_{ac}=0$ . The influence of cell swelling on thickness (or radius)  
 671 ratio have been discussed in Subsection 2.3, and both numerical and analytic results indicate  
 672 that the crypt morphologies under infinite organoid expansion are irrelevant to cell volume  $v_{ev}$ .

#### 673 **4. Organoid morphometric measurements and fitting strategy**

674 To validate the theory and extract mechanical parameters, we measured the thickness (and  
 675 radius) ratios of crypt and villus during normal organoid morphogenesis (Fig. 2C) and inflation  
 676 experiments, when the lumen volume is increased by PGE treatment (Fig. 5B-C) or  
 677 micropipette injection (Extended Data Fig. 7A-B). In the measurements, a dimensionless  
 678 volume  $\bar{v}$ , which is the current volume of a sample normalized by its originating volume, is  
 679 used to characterize the organoid inflation. Let  $v_0$  be the initial volume,  $\tilde{v}$  be the volume in  
 680 free mechanical state, which can be estimated as  $\tilde{v} \approx (1-\varphi)^{3/2} v_{ev}$  by using  $\partial\hat{F}/\partial\beta=0$  in Eq.  
 681 (30), then  $\bar{v}$  is related to the volume  $v$  employed in the model as  $\bar{v} = v/(v_0\tilde{v})$ . Considering  
 682 the crypt apical constriction as the main mechanical cue of organoid morphogenesis in bulging  
 683 phase, then the crypt mechanical parameters can be described by Eq. (32). Moreover, luminal  
 684 volume decreases and swelling of villus cells occurs in the budding phase (Fig. 7). In view of  
 685 these, one can find that the evolutions of thickness (and radius) ratios depend on four  
 686 parameters:  $m$ ,  $\tilde{\kappa}_0$ ,  $\varphi$ , and  $v_0$ , for bulged samples, and one more parameter  $v_{ev}$  for budded  
 687 ones. We can directly measure some of them, and determine the remaining parameters by  
 688 fitting experimental data with analytic formulation or numerical results.

#### 689 **4.1. Independently-measured geometric parameters**

690 Firstly, to estimate the shape factor of organoids, we can measure the shape factor of villus  
 691  $\kappa_v = 4\pi R_v^3/(N_v V_{ev}) \approx R_v/h_v$ , which is linearly dependent on  $\bar{v}$  as  $\kappa_v \approx \kappa_{v0}\bar{v}$ , with the initial  
 692 shape factor of villus  $\kappa_{v0}$  related to  $\tilde{\kappa}_0$  as  $\kappa_{v0} \approx \tilde{\kappa}_0 v_0$  for bulged organoids and  
 693  $\kappa_{v0} \approx (1-\varphi)^{1/2} \tilde{\kappa}_0 v_0$  for budded ones. Secondly, we also directly measured the crypt size  $\varphi$  of  
 694 bulged organoids as  $\varphi \approx h_c l_c^2/(4h_v R_v^2)$ , where the arclength of crypt section is denoted  $l_c$ , to  
 695 further constrain the system.

696

697

698 **4.2. Parameters extracted via direct fitting**

699 Analytic results in Section 2 provide guidance on the fitting of morphometric data.  
700 Replacing volume  $v$  by the new normalized volume  $\bar{v}$  in Eq. (31) leads to

$$701 \begin{aligned} \text{Bulged: } \quad \frac{R_c}{R_v} &\approx 1 - \varphi^{-1} \gamma_c \bar{v}_e^{-1/3} \frac{[(\alpha - 1)v_0 \bar{v} + 1]^{4/3}}{v_0 \bar{v} - 1}, & \frac{h_c}{h_v} &\approx \bar{v}_e^{1/3} [(\alpha - 1)v_0 \bar{v} + 1]^{2/3}, \\ \text{Budded: } \quad \frac{R_c}{R_v} &\approx \varphi^{1/2} (1 - \varphi)^{-1/2} \bar{v}_e^{1/3} (uv_0)^{-1/3} \bar{v}^{-1/3}, & \frac{h_c}{h_v} &\approx \bar{v}_e^{1/3} (uv_0)^{2/3} \bar{v}^{2/3} \end{aligned}, \quad (34)$$

702 where  $\bar{v}_e = v_{ec} / v_{ev}$  is the volume ratio of a crypt cell to a villus cell. In this new formulation,  
703 thickness (or radius) ratio is only related to cell volumes by  $\bar{v}_e^{1/3}$ . As aforementioned, cell  
704 swelling is insignificant in the bulging phase, but the swelling of villus cells becomes important  
705 in the budding phase. Therefore, we have  $\bar{v}_e \approx 1$  for a bulged organoid, and  $\bar{v}_e = v_{ev}^{-1} < 1$  for a  
706 budded one. During the bulging of organoids, the crypt mechanical parameters vary with time,  
707 while the lumen volume stays almost constant. In contrast, the inflation experiments provide a  
708 setting where lumen volumes change drastically while crypt mechanics can be considered  
709 constant. In view of these, based on the analytical expressions of Eq. (34), we further discuss  
710 specific relations between morphometric parameters, i.e. thickness (and radius) ratios, and  
711 bulging time or lumen volume in the following, and also derive the relation between thickness  
712 ratio and radius ratio. Using these analytical relations, we can fit and rescale the experimental  
713 data.

714 **4.2.1. Dynamics of organoid bulging**

715 First, we consider the bulging dynamics of organoids. Experiments show that the volume  
716 stays constant in this process, that is  $\bar{v} \approx 1$ . According to Eq. (34), the morphometric parameters  
717  $R_c / R_v$  and  $h_c / h_v$  are then linked to each other via a simple relation:

$$718 \quad \frac{R_v}{R_c} \approx 1 + \text{pm1} \cdot (h_c / h_v)^2 \left[ (h_c / h_v)^{3/2} - 1 \right], \quad (35)$$

719 where  $\text{pm1} = [2\varphi\kappa_{v_0}(v_0 - 1)]^{-1}$  is a single fitting parameter. Importantly, this expression is  
720 independent on the dynamics of how crypt apical tension varies in time, providing a simple  
721 and robust model prediction. The six samples in Fig. 2C have different characteristic sizes, we  
722 can get shape factor  $\kappa_{v_0} : 2.7 \pm 1.8$  (mean  $\pm$  SD) and crypt size  $\varphi : 0.2 \pm 0.06$  (mean  $\pm$  SD). The  
723 measurement result of  $\kappa_{v_0}$ , which is obtained by using  $\kappa_{v_0} \approx R_v / (h_v \bar{v})$  as given in Subsection  
724 4.1, indicates that the radius to thickness ratio  $R_v / h_v$  is typically larger than 2 (volume  $\bar{v} \approx 1$

725 for bulging organoids), providing a safety check on the “ thin-film assumption” employed in  
 726 Subsection 1.1. Extracting pm1 from these samples allows us to rescale the morphometric  
 727 parameters of every sample to verify that, even for organoids with distinct initial shape factors  
 728 and crypt sizes, their morphometric parameters can be well-fitted by Eq. (35), as shown in Fig.  
 729 2C’’. In the fitting and rescaling, the initial volume  $v_0$  is estimated as  $2.5 \pm 0.5$  (mean  $\pm$  SD,  
 730 from the analytical theory), which gave consistent values across different organoids. We note  
 731 for instance that Sample 3 appears as an outlier in terms of thickness ratio (with a much larger  
 732 value than others), but this is explained by the fact that it is larger in size ( $\kappa_{v_0} = 6.2$ ), and larger  
 733 organoids need larger crypt apical tension (which results in a thicker crypt monolayer) to bud,  
 734 as discussed in Section 3. Despite its specific morphometric character, this sample can also be  
 735 fitted by choosing a reasonable volume value ( $v_0 = 2.5$ ), consistent with other organoids.

736 On the other hand, to reproduce the evolution of each morphological ratio in time, one  
 737 must assume a specific dynamic relation for tension changes in time. For simplicity, we  
 738 consider a linear increase of the normalized crypt apical tension  $m$  with time  $t$ , that is  
 739  $m = m_0 + m't$ , where  $m_0$  and  $m'$  are respectively the initial value and the slope. Then, the  
 740 evolution of thickness ratio  $h_c / h_v$  and radius ratio  $R_c / R_v$  can be estimated as

$$741 \quad \frac{h_c}{h_v} \approx (\text{pm2} + \text{pm3} \cdot t + 1)^{2/3}, \quad \frac{R_v}{R_c} \approx 1 + \text{pm1} \cdot (\text{pm2} + \text{pm3} \cdot t) (\text{pm2} + \text{pm3} \cdot t + 1)^{4/3}, \quad (36)$$

742 where  $\text{pm2} = (m_0 - 1)v_0 / 2$ ,  $\text{pm3} = m'v_0 / 2$ . We can get pm2 and pm3 simultaneously by fitting  
 743 the experimental data of thickness ratios, and obtain pm1 by fitting the data of radius ratios  
 744 (both of the evolutions were well-fitted by these analytic forms, see Extended Data Fig. 3C-D).  
 745 For the six samples we measured, by using analytic fitting, we can get their initial crypt apical  
 746 tension  $m_0 : 1.2 \pm 0.2$  (mean  $\pm$  SD). We can also get the enhanced crypt apical tension  $m$  at the  
 747 end of the bulging phase (prior to water uptake by villus cells):  $1.6 \pm 0.4$  (mean  $\pm$  SD). Besides  
 748 the data fitting using analytic equation (36), we also use full numerical results (e.g. those in  
 749 Section 1 and 3) to fit the experimental data, as shown in Fig. 2C’ and Extended Data Fig. 3B.  
 750 In this way, we can get the initial apical tension  $m_0 : 1.3 \pm 0.3$  (mean  $\pm$  SD), and the apical  
 751 tension  $m$  at the end of the bulging phase:  $1.7 \pm 0.6$  (mean  $\pm$  SD). We can find that both fittings  
 752 get quite close estimations of apical tension  $m$ , providing a safety check on the fitting procedure.  
 753 The estimation of  $m$  at the end of the bulging is interesting, as it remains significantly smaller  
 754 (60%) of the critical value of  $m$  that leads to crypt budding (this proportion is calculated for  
 755 three samples with representative crypt sizes and shape factors), and also argues that changes

756 in lumen volume will play a key role on crypt morphogenesis. Furthermore,  $m$  is also much  
 757 smaller than the critical value  $m_{\text{crit}}$  that allows to remain budded upon infinite volume expansion  
 758 (40%).

#### 759 4.2.2. Inflation of bulged organoids

760 Our analysis of the dynamics of bulging organoid suggests that their apical tension  $m$  is  
 761 below the critical point of Fig. 5A, so that these organoids would be expected to open up upon  
 762 inflation, a key prediction we now test. For the inflation of bulged samples, we can assume that  
 763 tensions remain constant, and eliminate volume from the equation to derive again a relation  
 764 between  $R_c / R_v$  and  $h_c / h_v$  :

$$765 \quad \frac{R_v}{R_c} \approx 1 + \frac{(h_c/h_v)^2}{\text{pg1} \cdot \left[ (h_c/h_v)^{3/2} - \alpha \right]}, \quad (37)$$

766 where  $\text{pg1} = -\phi\gamma_c^{-1}(\alpha - 1)^{-1}$ . In contrast to the relation of morphometric parameters in Eq. (35)  
 767 for bulging evolution, the thickness ratio  $h_c / h_v$  and the radius ratio  $R_c / R_v$  show similar  
 768 trends during organoid inflation. The dependence of morphometric parameters on volume  $\bar{v}$   
 769 yields

$$770 \quad \frac{h_c}{h_v} \approx (\text{pg2} \cdot \bar{v} + 1)^{2/3}, \quad \frac{R_v}{R_c} \approx 1 + \frac{(\text{pg2} \cdot \bar{v} + 1)^{4/3}}{\text{pg3} \cdot (v_0 \bar{v} - 1)}, \quad (38)$$

771 Where  $\text{pg2} = (m - 1)v_0/2$ ,  $\text{pg3} = 2\phi\kappa_{v_0}/\text{pg2}$ . The experimental data again was in agreement  
 772 with these analytic forms (Extended Data Fig. 7C), so that by fitting the experimental data of  
 773 thickness ratios, we can get  $\text{pg2}$ , which can be further used to estimate  $\text{pg3}$ . Then, the initial  
 774 volume  $v_0$  is employed as the only fitting parameter to fit the data of radius ratios. Further  
 775 using the relations between parameters in Eq. (37) and those in (38):  $\text{pg1} = v_0 \cdot \text{pg3}/\text{pg2}$ ,  
 776  $\alpha = 1 + \text{pg2}/v_0$ , we can find that the functional form of Eq. (37) predicts the evolution of all  
 777 six bulged inflation samples (from PGE or pipette), as shown in Fig. 5D. For the six samples  
 778 we measured, we can get estimates of the initial volume  $v_0$ :  $1.5 \pm 0.3$  (mean  $\pm$  SD) (i.e. always  
 779 larger than 1, consistent with initially swollen organoids as found in the fits of the bulging  
 780 evolution, see Subsection 4.2.1), and the normalized crypt apical tension  $m$ :  $1.3 \pm 0.05$  (mean  
 781  $\pm$  SD), which is close to the initial tension  $m_0$  estimated for the six bulging samples in  
 782 Subsection 4.2.1, providing another consistency check of the fitting approach and model (and

783 showing in particular that the parameters used in the fits/collapse of Fig. 2 can be validated by  
 784 independent datasets).

### 785 4.2.3. Inflation of budded organoids

786 Finally, as aforementioned, the morphometric parameters of budded samples obey a  
 787 simple scaling law, and we can easily get the relation between  $R_c / R_v$  and  $h_c / h_v$ :

$$788 \quad \frac{R_c}{R_v} = (\text{pd1} \cdot h_c / h_v)^{-1/2}, \quad (39)$$

789 where  $\text{pd1} = \varphi^{-1} (1 - \varphi) v_{\text{ev}}$ , and their relation with  $\bar{v}$  can be recast as

$$790 \quad \frac{h_c}{h_v} \approx (\text{pd2} \cdot \bar{v})^{2/3}, \quad \frac{R_c}{R_v} = (\text{pd3} \cdot \bar{v})^{-1/3}, \quad (40)$$

791 where  $\text{pd2} = v_{\text{ev}}^{-1/2} \cdot uv_0$ ,  $\text{pd3} = \text{pd1}^{2/3} \cdot \text{pd2}$ . These scaling relationships can in fact be derived from  
 792 purely geometric considerations, under the assumption that near-spherical villi bear the  
 793 deformation alone. As shown in Fig. 5E and Extended Data Fig. 7C', they can fit the evolution  
 794 of budded inflation samples (from PGE or pipette) very well. To estimate the normalized crypt  
 795 apical tension  $m$ , we can further introduce the shape factor of crypt  $\kappa_c = 4\pi R_c^3 / (N_c V_{\text{ec}})$ , which  
 796 can be estimated either by directly using  $\kappa_c \approx R_c / h_c$  or by using its relation with other fitting  
 797 parameters, that is  $\kappa_c = \kappa_{v_0} (\text{pd2}^2 \cdot \text{pd3})^{-1/3}$ , then the normalized crypt apical tension is

$$798 \quad m = \frac{4\varphi^{1/2} \tilde{\kappa}_0 + 2}{2\kappa_c + 1} - 1. \quad (41)$$

799 Although  $\varphi^{1/2} \tilde{\kappa}_0$  is hard to get by direct measurement, we can use the analytic critical  
 800 conditions of crypt morphologies under infinite volume expansion (discussed in Subsection 2.2  
 801 and Section 3) to estimate the lower bound of  $m$  (i.e.,  $m_{\text{crit}}$ ). Now we have  $\left(\frac{m+1}{m-1}\right)^{3/2} - \frac{m+1}{m-1} < \frac{1}{2\kappa_c}$   
 802 to forbid the crypt to open up with volume expansion and  $\kappa_c > 0.5$  to guarantee that  $R_{\text{ac}} > 0$   
 803 always holds. For the six samples we measured, we can get an estimation of  $m_{\text{crit}} : 3.6 \pm 0.8$   
 804 (mean  $\pm$  SD).

### 805 4.3. Validation of tension estimation

806 Finally, we can use our measurements of Myosin levels, as well as our laser ablation  
 807 experiments on apical junctions (both measured for different times and regions) to semi-  
 808 quantitatively constrain the crypt apical tension. As aforementioned, lateral myosin intensity

809 does not show strong spatio-temporal changes (Fig. 3B), so that we consider constant lateral  
810 tension  $\Gamma_l$  in the fitting. Furthermore, apical Myosin intensity in crypts increases by around  
811 50% from spherical to bulged shapes, and by around two-fold from bulged to budded shapes,  
812 leading us to hypothesize that tension increases is a key driver of the bulged-budded  
813 transformation. This is also consistent with laser ablation experiments on bulged *vs.* budded  
814 crypts, showing a roughly two-fold increase (Fig. 2D). We note that because these ablations  
815 are done in a highly local manner, they only probe the local tensions of the cell-cell junctions,  
816 whereas more global tissue-wide ablation, such as used in *Drosophila* notum, is used instead  
817 to estimate global tissue tensions (14), which would also depend on parameters like lumen  
818 swelling in our systems.

819       Importantly, these magnitudes of apical crypt tensions for an organoid changes from  
820 spherical to bulged to budded shapes are consistent with the values extracted from  
821 aforementioned morphogenesis/inflation fittings (we had estimated  $m_{\text{crit}} : 3.6 \pm 0.8$  from  
822 budded sample inflation, and  $1.7 \pm 0.6$  at the end of bulged state from Fig. 2, arguing that a  
823 doubling of tension estimated from laser-cutting/Myosin intensity would be sufficient to bud),  
824 providing an independent validation for the parameter set we propose here, and the range of  
825 the theoretical phase diagram proposed in Fig. 5A.

826

827

- 828 1. A. G. Fletcher, M. Osterfield, R. E. Baker, S. Y. Shvartsman, Vertex Models of  
829 Epithelial Morphogenesis. *Biophys. J.* **106**, 2291–2304 (2014).
- 830 2. E. Hannezo, J. Prost, J.-F. Joanny, Theory of epithelial sheet morphology in three  
831 dimensions. *PNAS.* **111**, 27–32 (2014).
- 832 3. S. Alt, P. Ganguly, G. Salbreux, Vertex models: from cell mechanics to tissue  
833 morphogenesis. *Philos. Trans. R. Soc. Lond. B. Biol. Sci.* **372**, 20150520 (2017).
- 834 4. G. Salbreux, G. Charras, E. Paluch, Actin cortex mechanics and cellular  
835 morphogenesis. *Trends Cell Biol.* **22**, 536–545 (2012).
- 836 5. D. Serra *et al.*, Self-organization and symmetry breaking in intestinal organoid  
837 development. *Nature.* **569**, 66–72 (2019).
- 838 6. F. Jülicher, R. Lipowsky, Shape transformations of vesicles with intramembrane  
839 domains. *Phys Rev E.* **53**, 2670–2683 (1996).
- 840 7. N. Štorgel, M. Krajnc, P. Mrak, J. Štrus, P. Ziherl, Quantitative Morphology of  
841 Epithelial Folds. *Biophys. J.* **110**, 269–277 (2016).
- 842 8. O. Polyakov *et al.*, Passive Mechanical Forces Control Cell-Shape Change during  
843 *Drosophila* Ventral Furrow Formation. *Biophys. J.* **107**, 998–1010 (2014).
- 844 9. H. Turlier, B. Audoly, J. Prost, J.-F. Joanny, Furrow Constriction in Animal Cell  
845 Cytokinesis. *Biophys. J.* **106**, 114–123 (2014).
- 846 10. C. Bielmeier *et al.*, Interface Contractility between Differently Fated Cells Drives  
847 Cell Elimination and Cyst Formation. *Current Biology.* **26**, 563–574 (2016).
- 848 11. M. Misra, B. Audoly, I. G. Kevrekidis, S. Y. Shvartsman, Shape Transformations of  
849 Epithelial Shells. *Biophys. J.* **110**, 1670–1678 (2016).
- 850 12. J. Rozman, M. Krajnc, P. Ziherl, Collective Cell Mechanics of Small-Organoid  
851 Morphologies. *Nature Commun.* **11**, 3805 (2020).
- 852 13. E. Latorre *et al.*, Active superelasticity in three-dimensional epithelia of controlled  
853 shape. *Nature.* **563**, 203–208 (2018).
- 854 14. I. Bonnet *et al.*, Mechanical state, material properties and continuous description of  
855 an epithelial tissue. *Journal of The Royal Society Interface.* **9**, 2614–2623 (2012).
